# Supplementary material for: Selective footprints and genes relevant to cold adaptation and other phenotypic traits are unscrambled in the genomes of divergently selected chicken breeds
Source: Springer Nature journal article supplement (doi:10.1186/s40104-022-00813-0), 2023-02-24

Fig. S3. Distribution of ROH islands among chromosomes

Chromosome 1

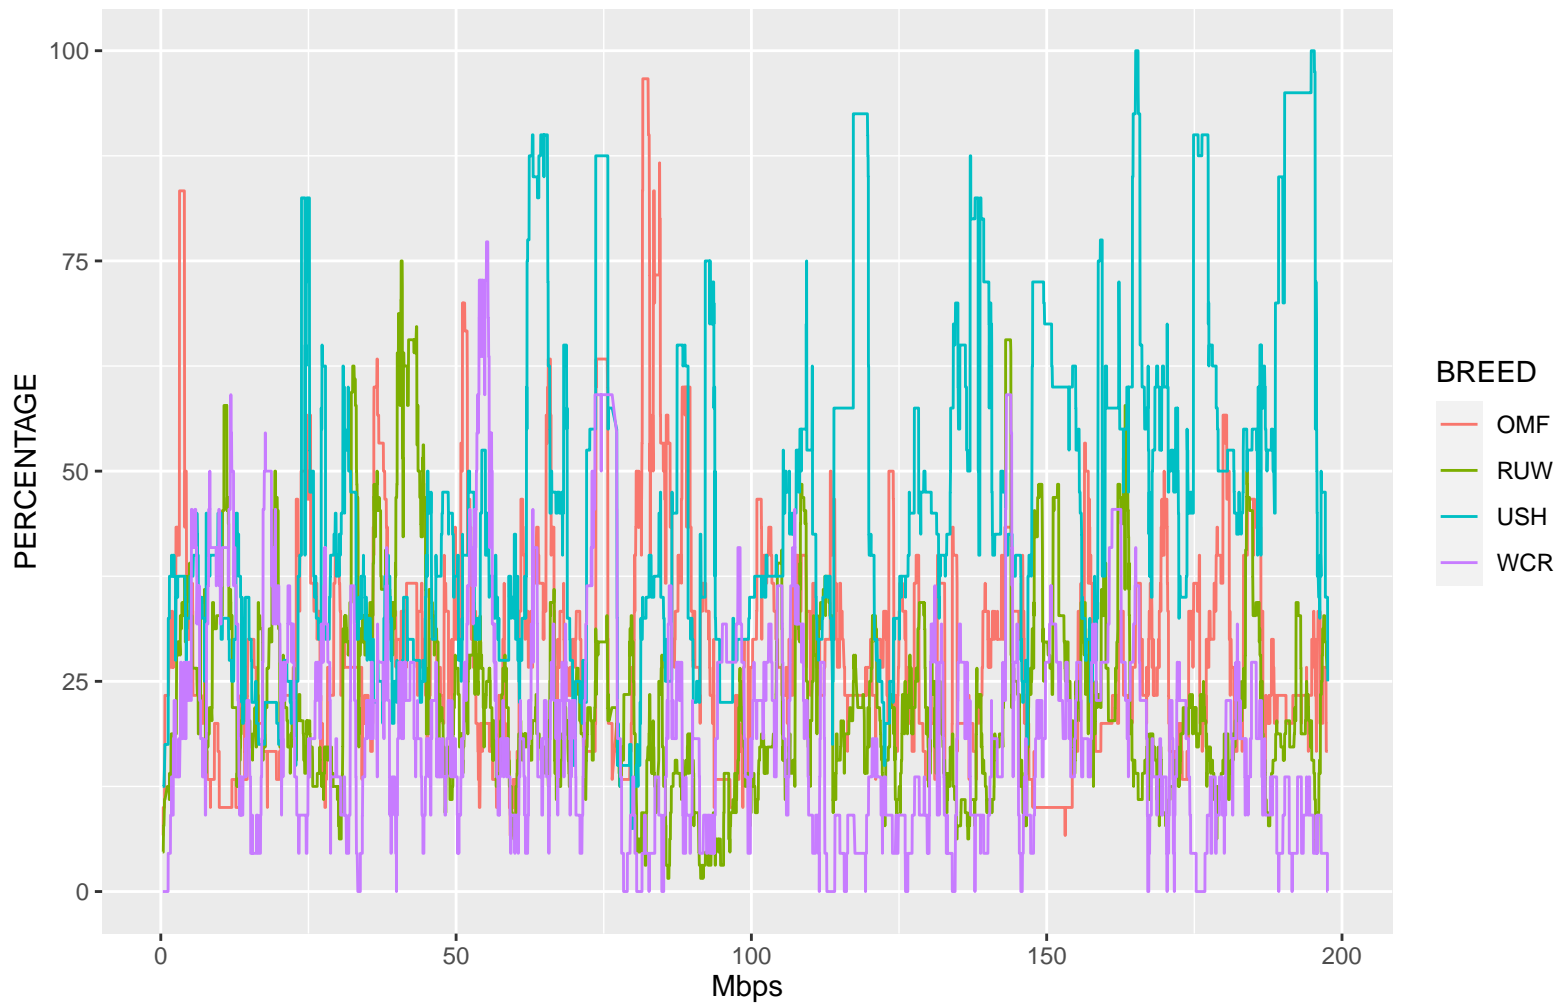

## Chromosome 2

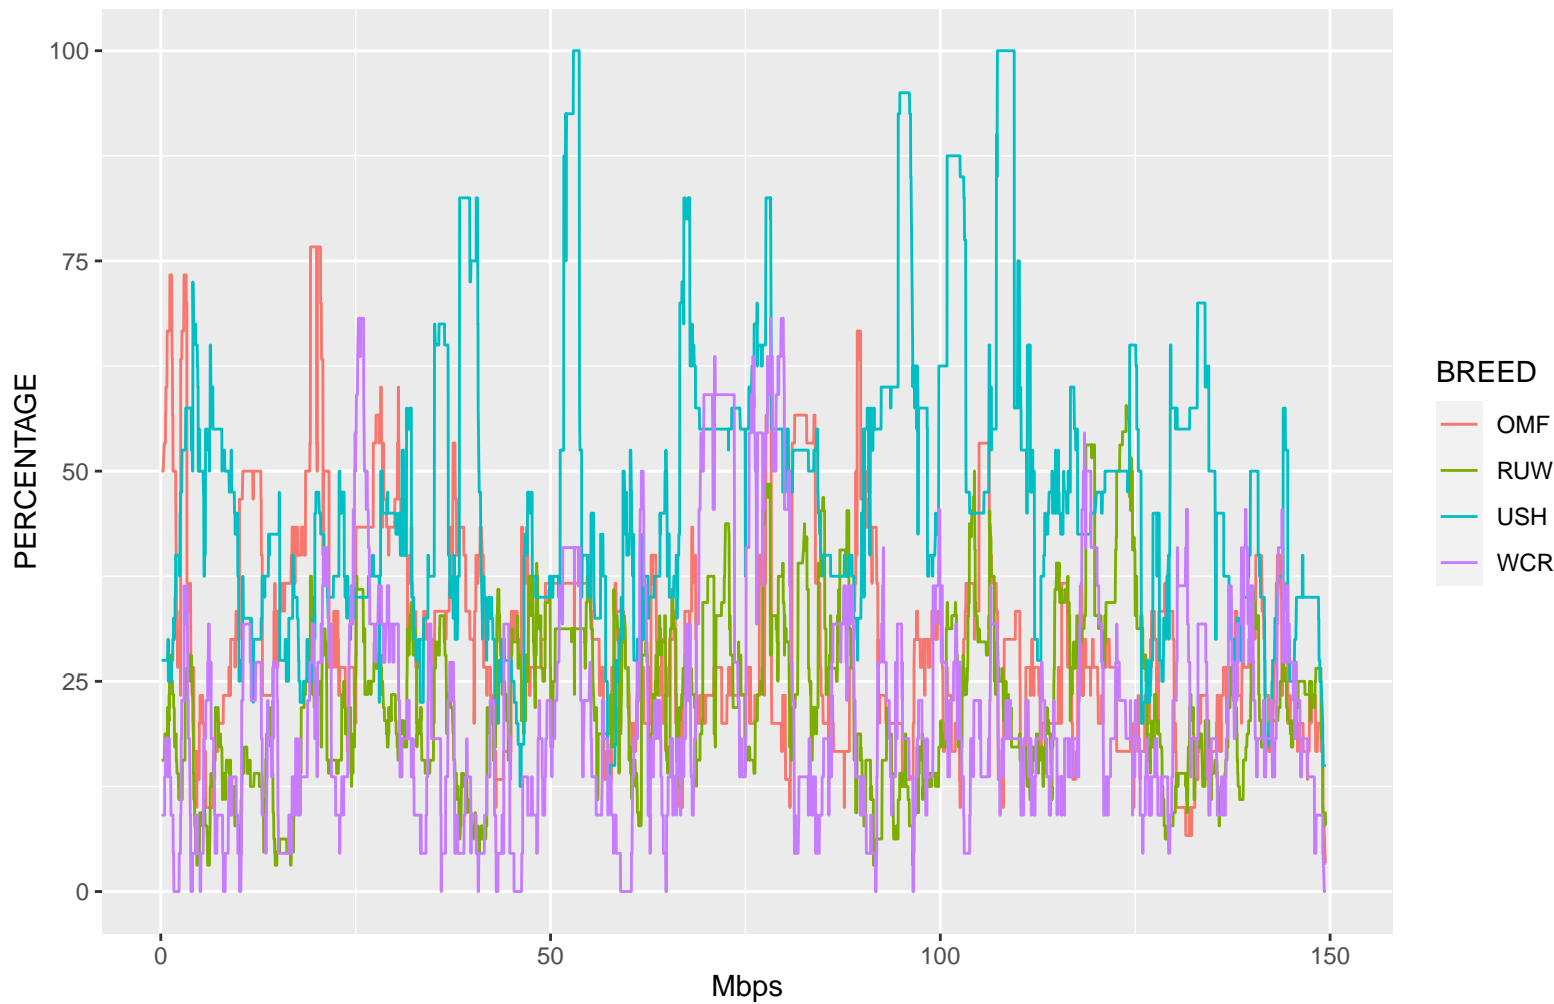

## Chromosome 3

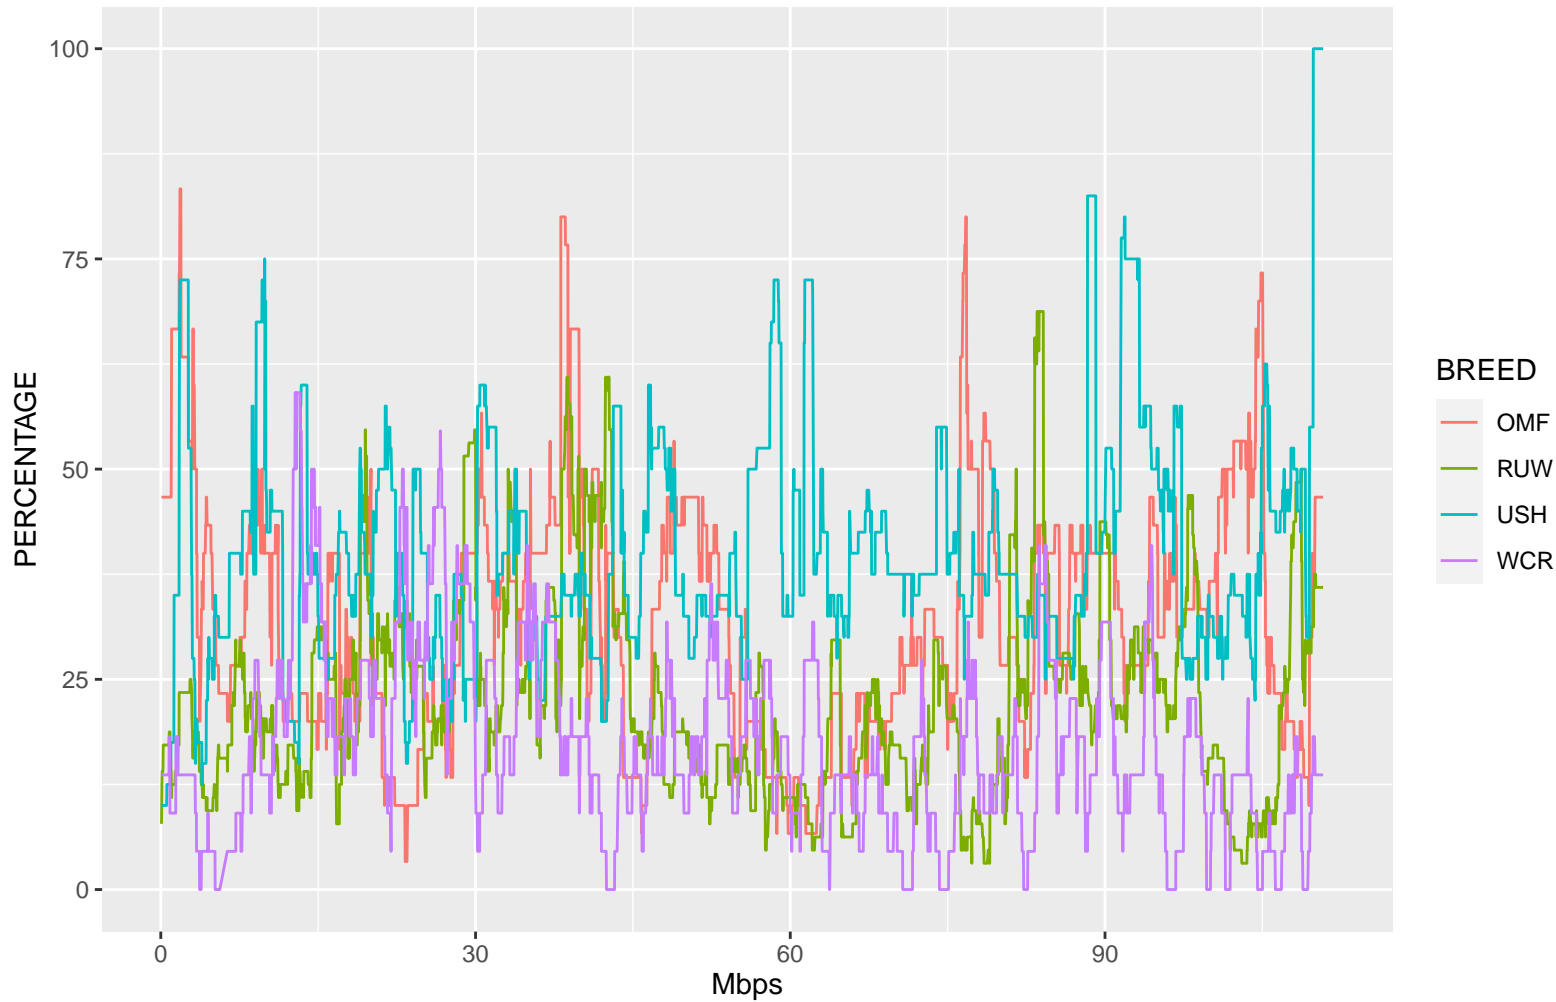

## Chromosome 4

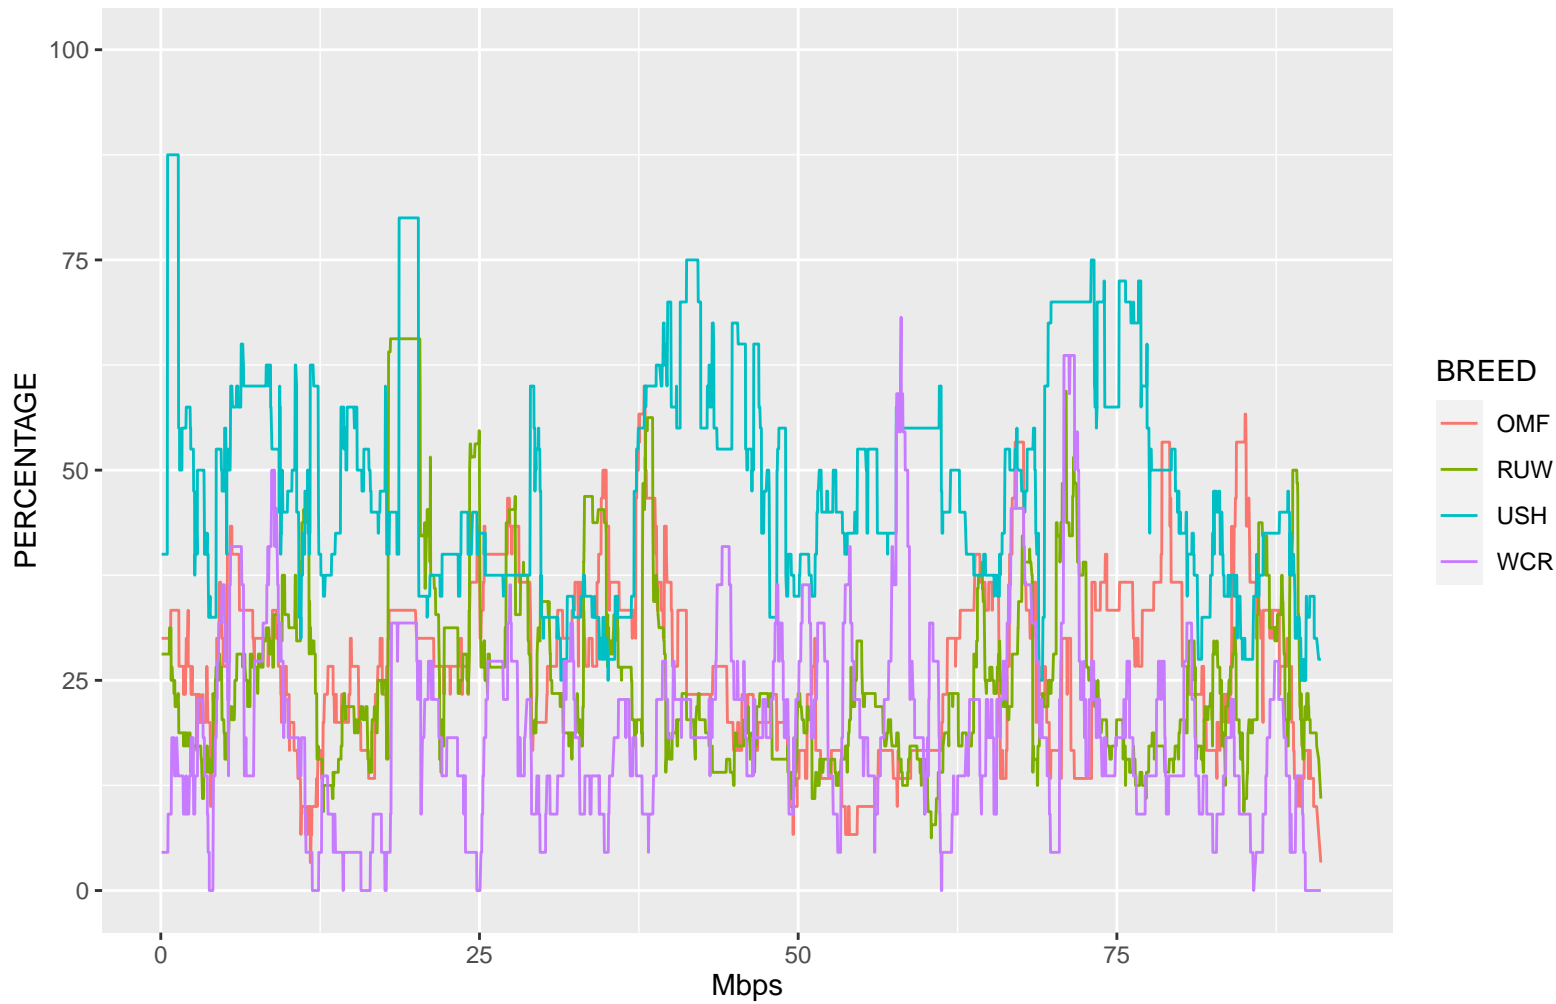

## Chromosome 5

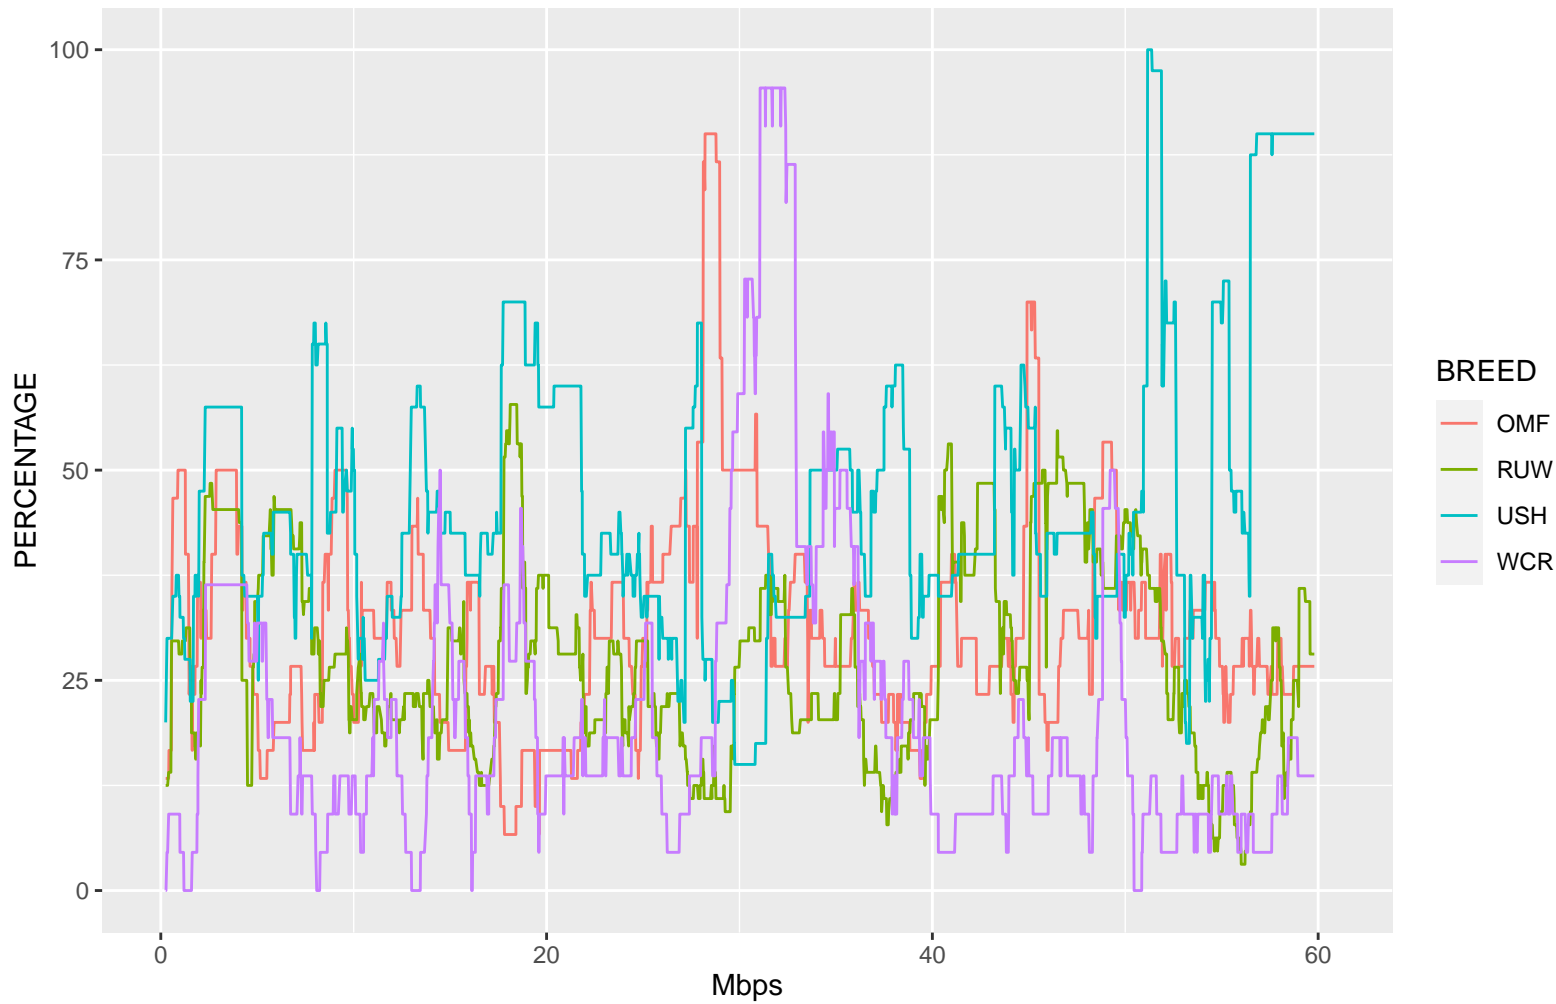

# Chromosome 6

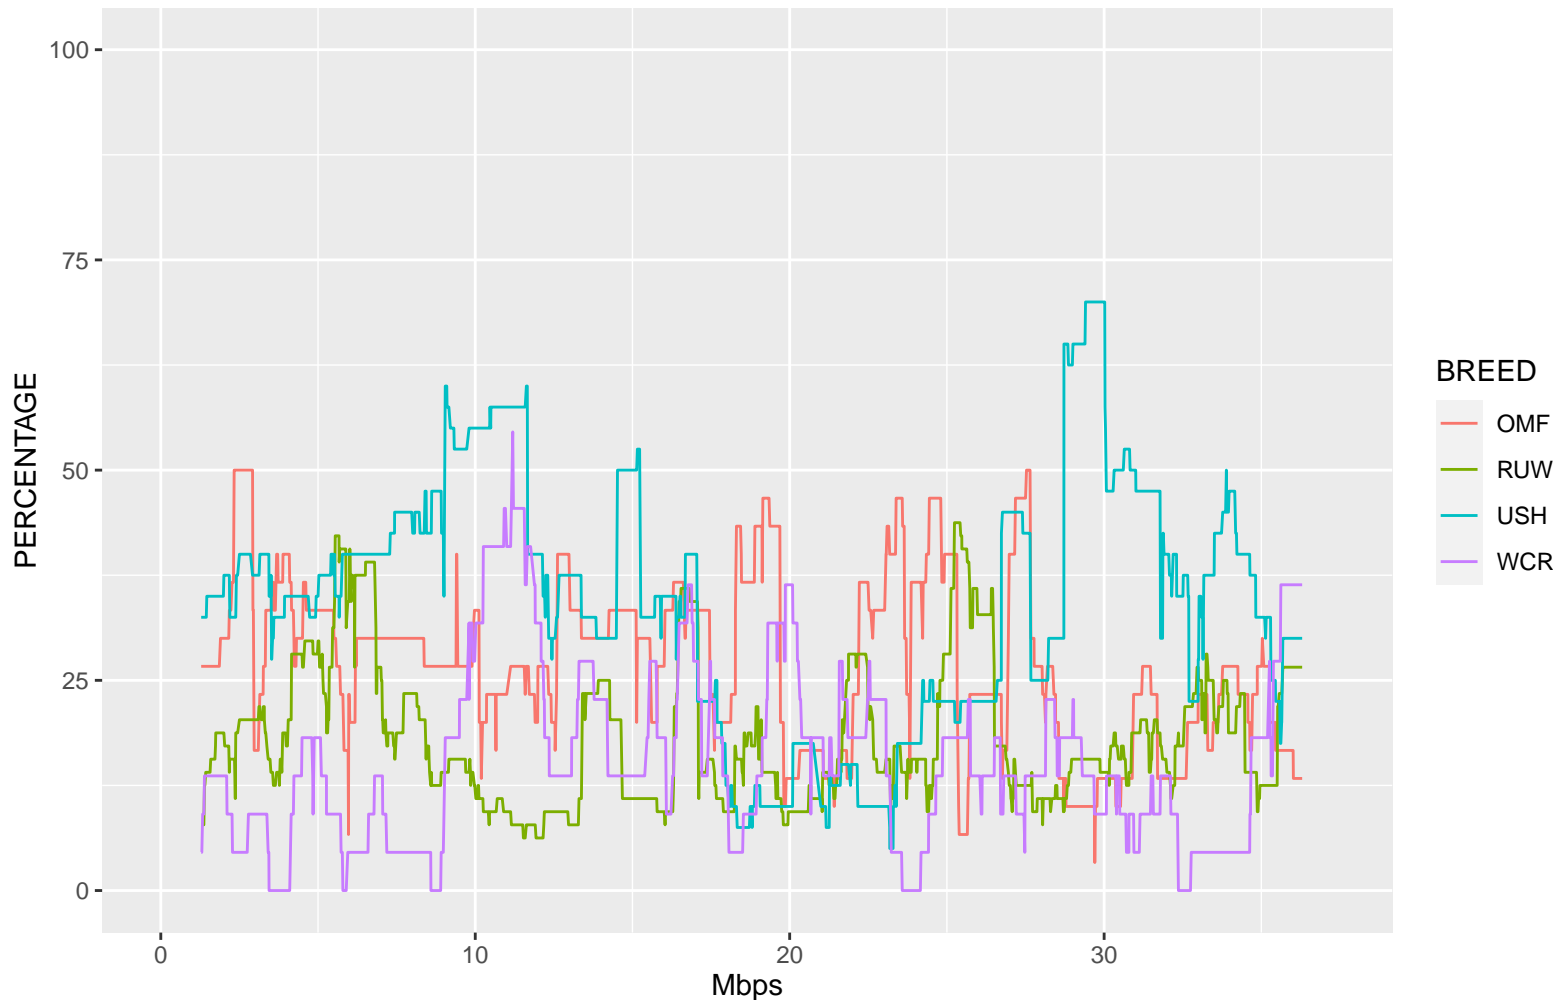

## Chromosome 7

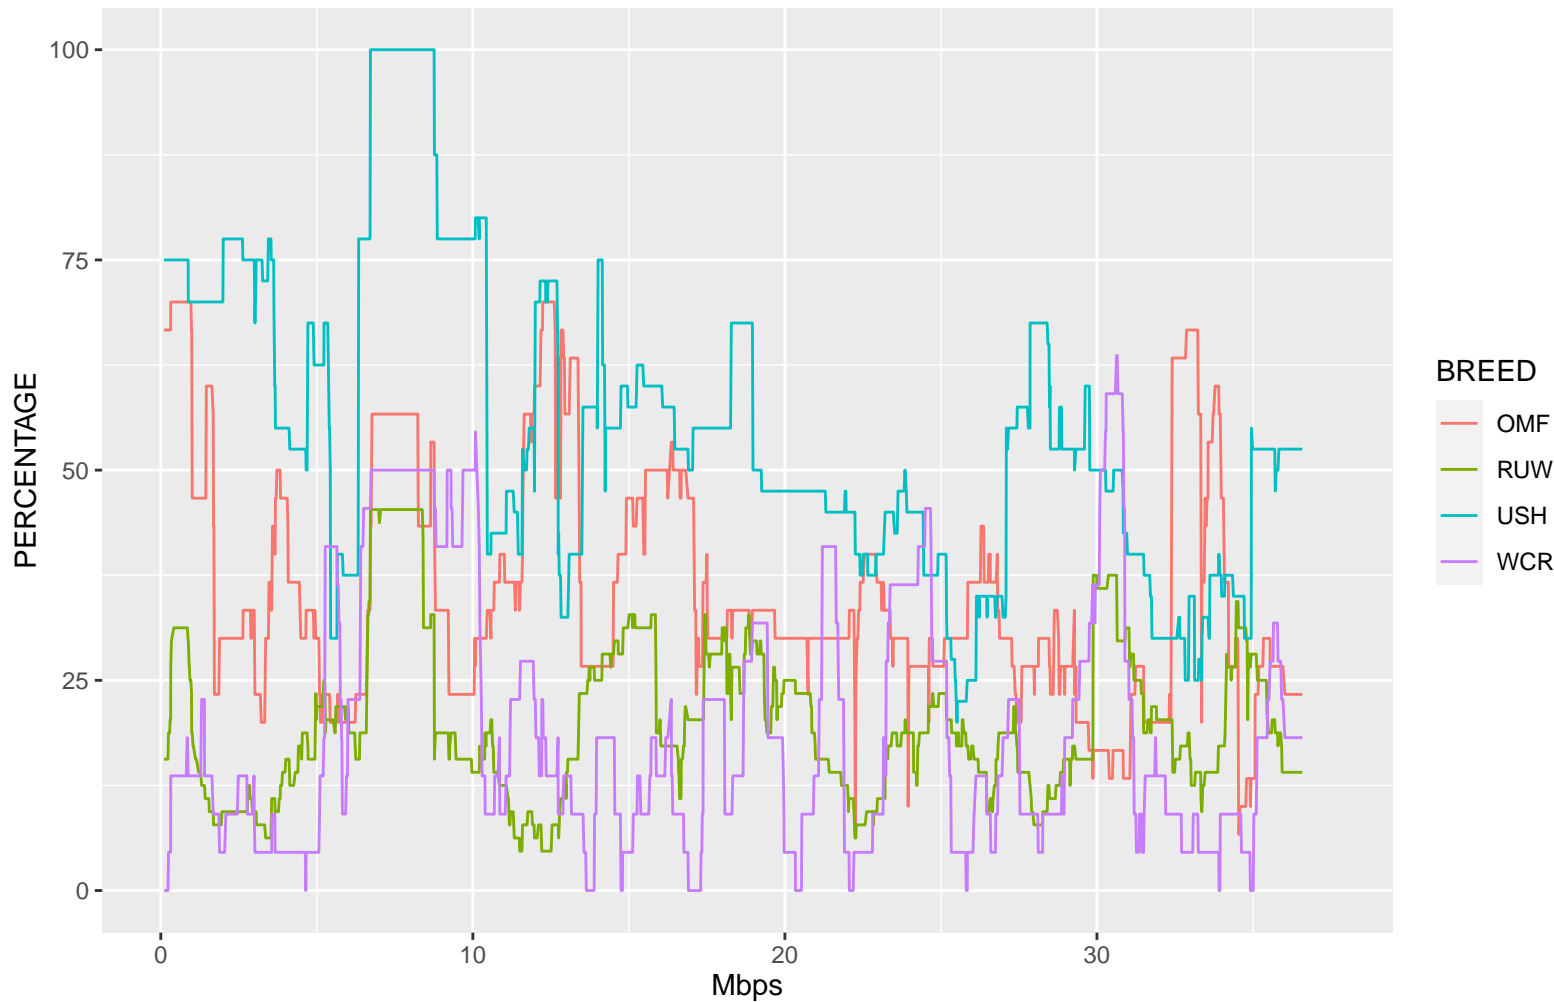

# Chromosome 8

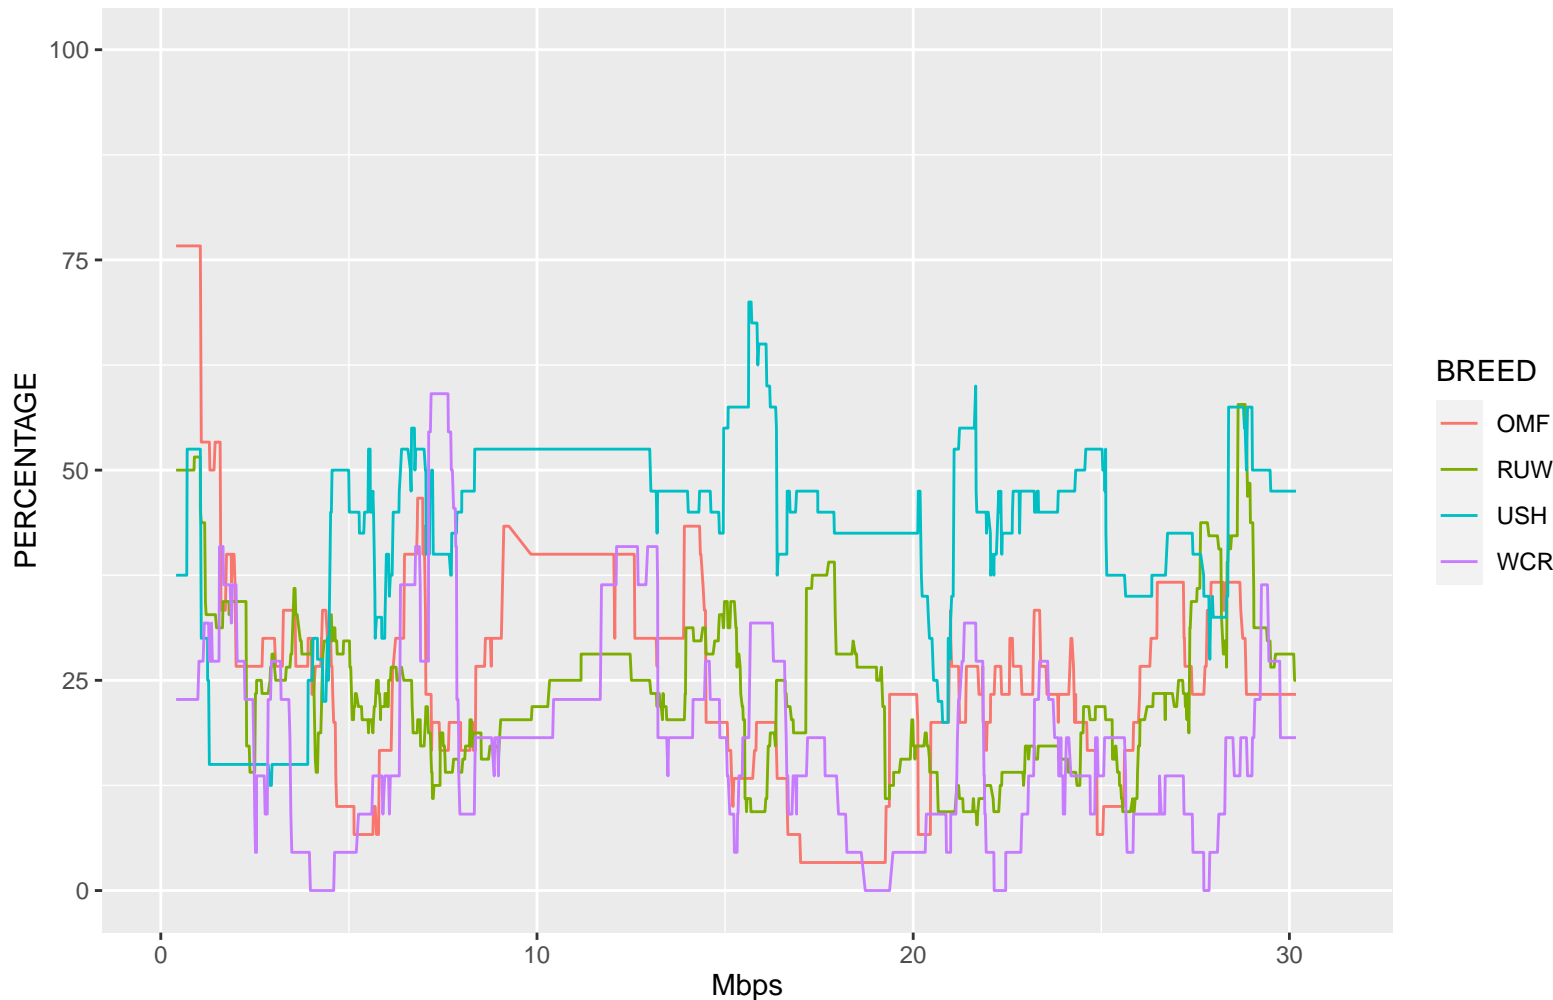



# Chromosome 9

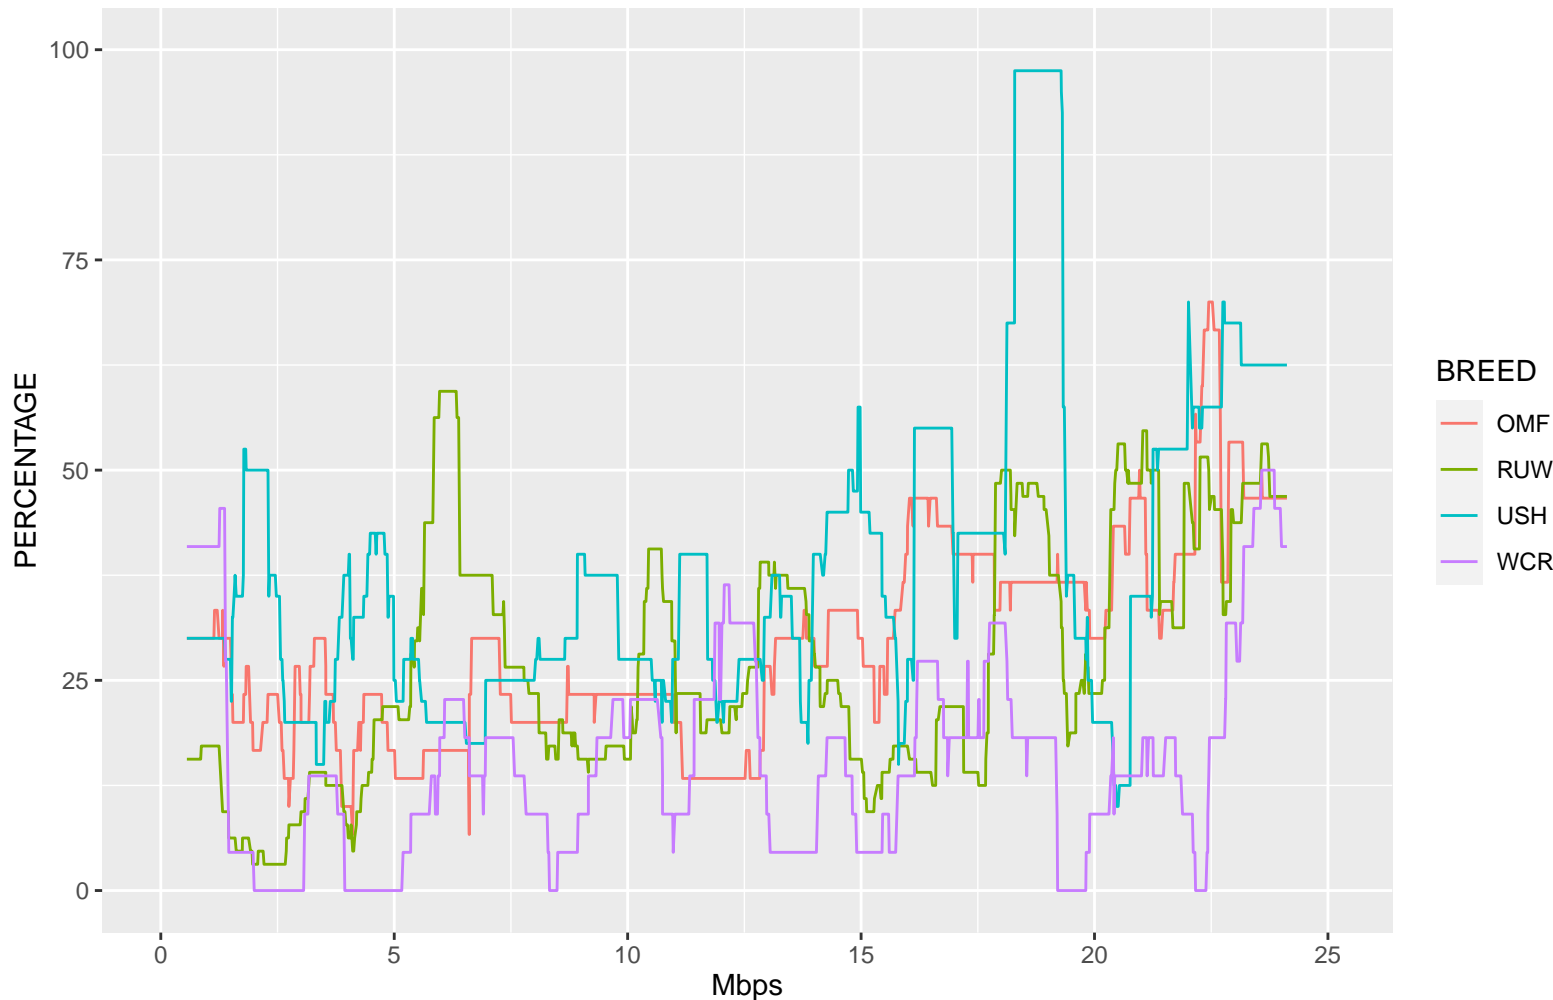

# Chromosome 10

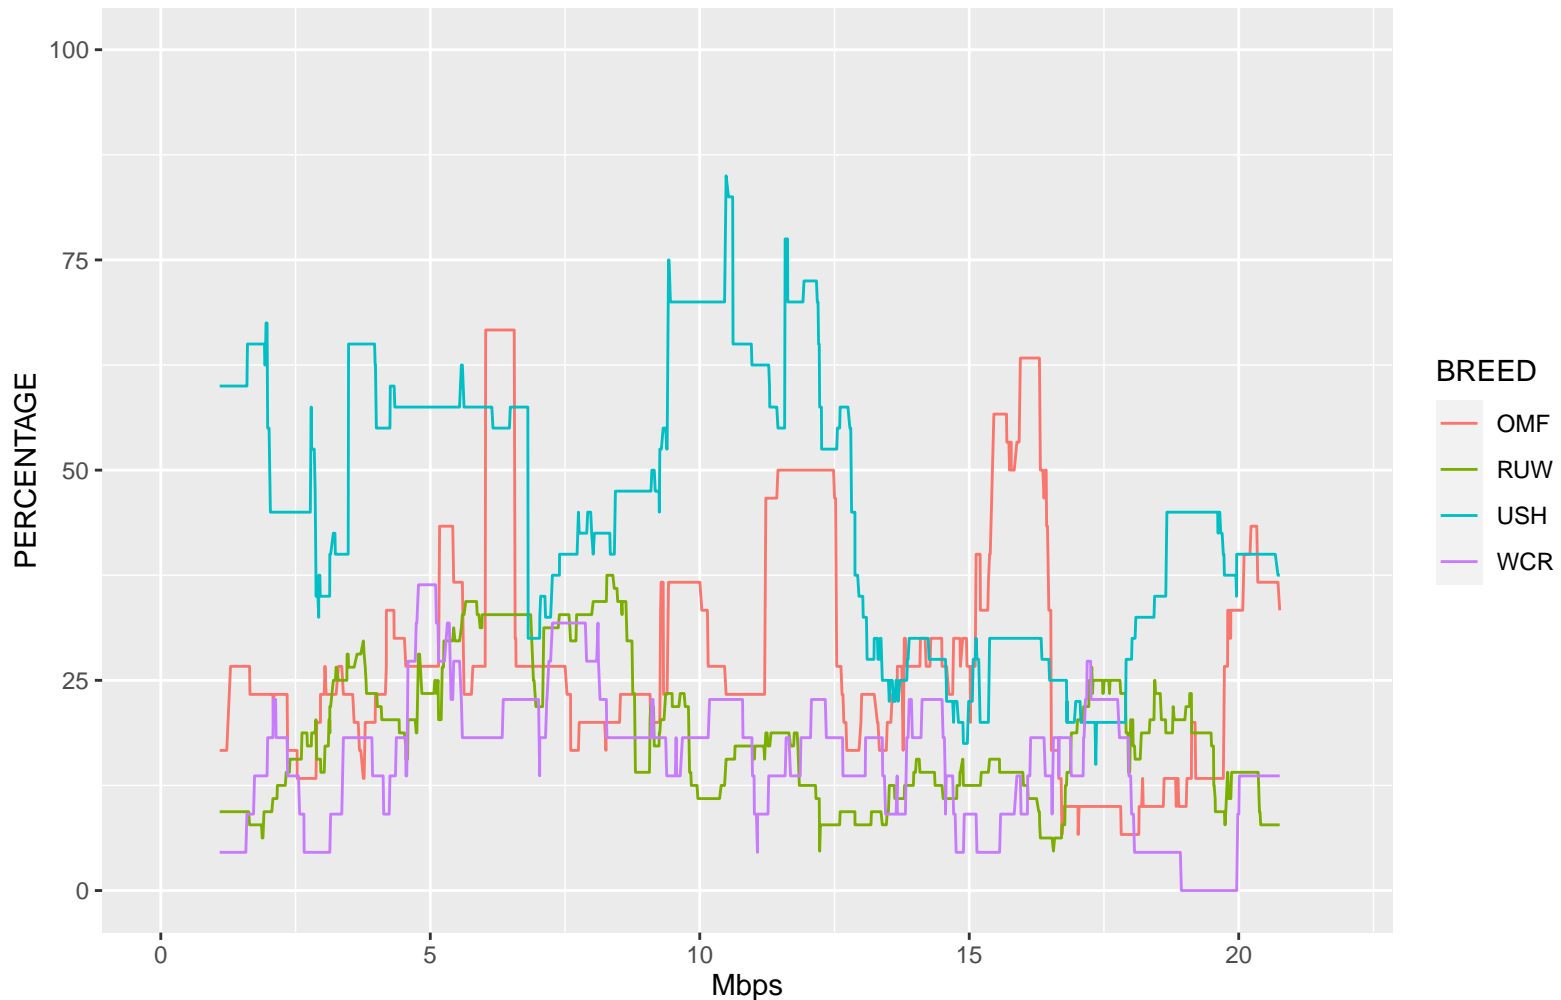

# Chromosome 11

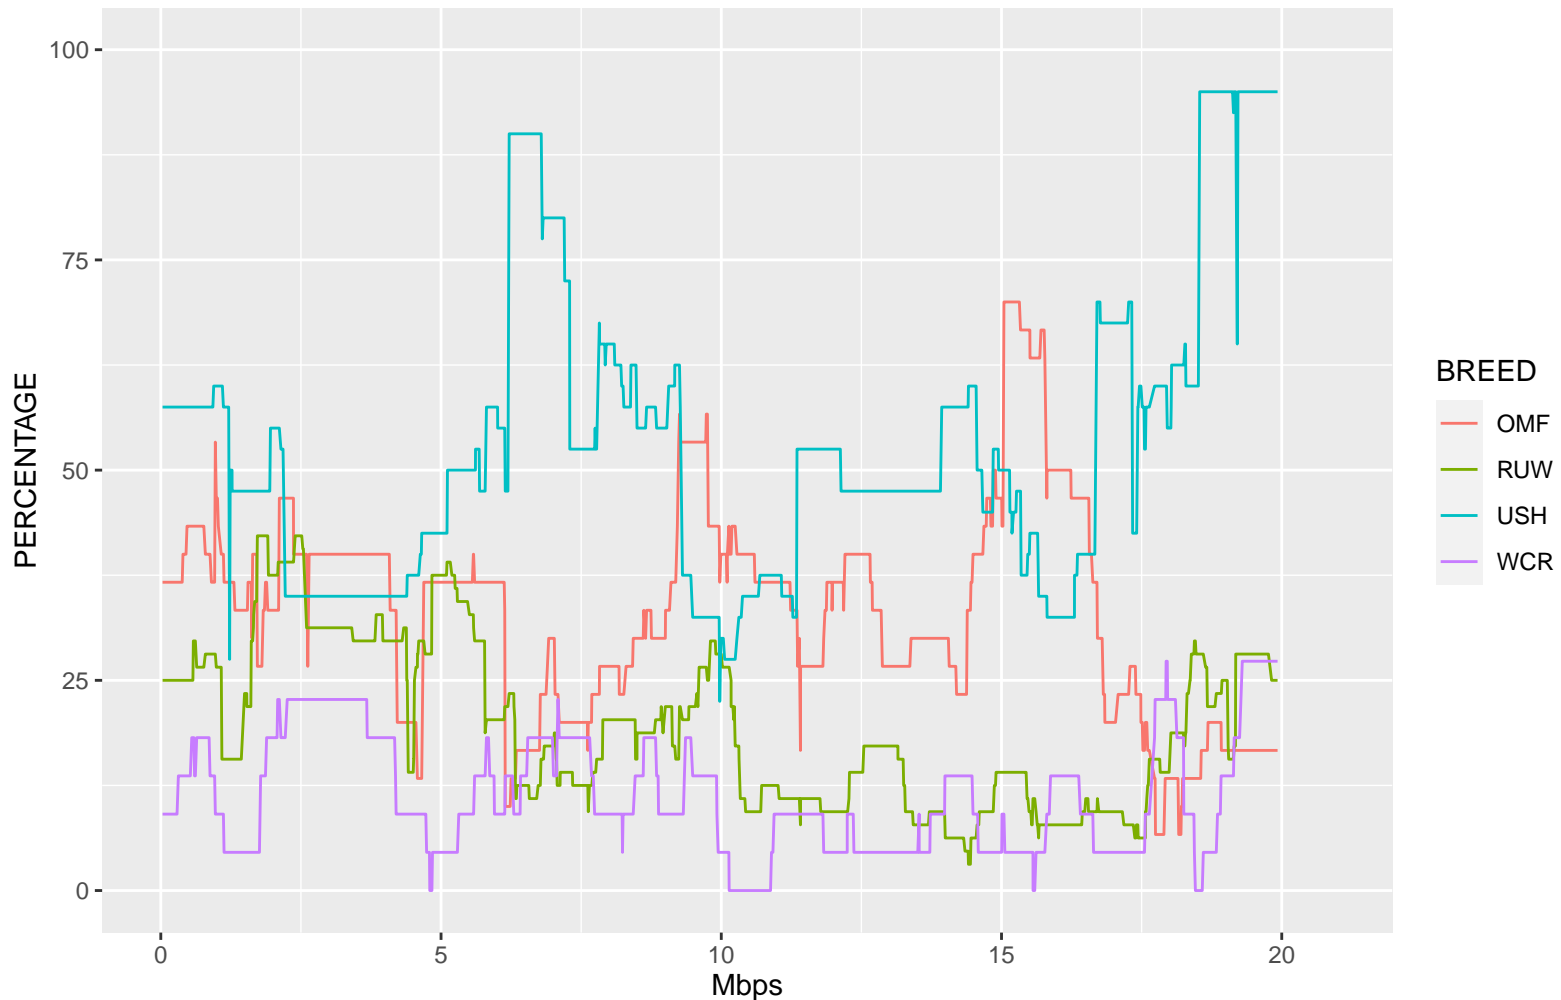

# Chromosome 12

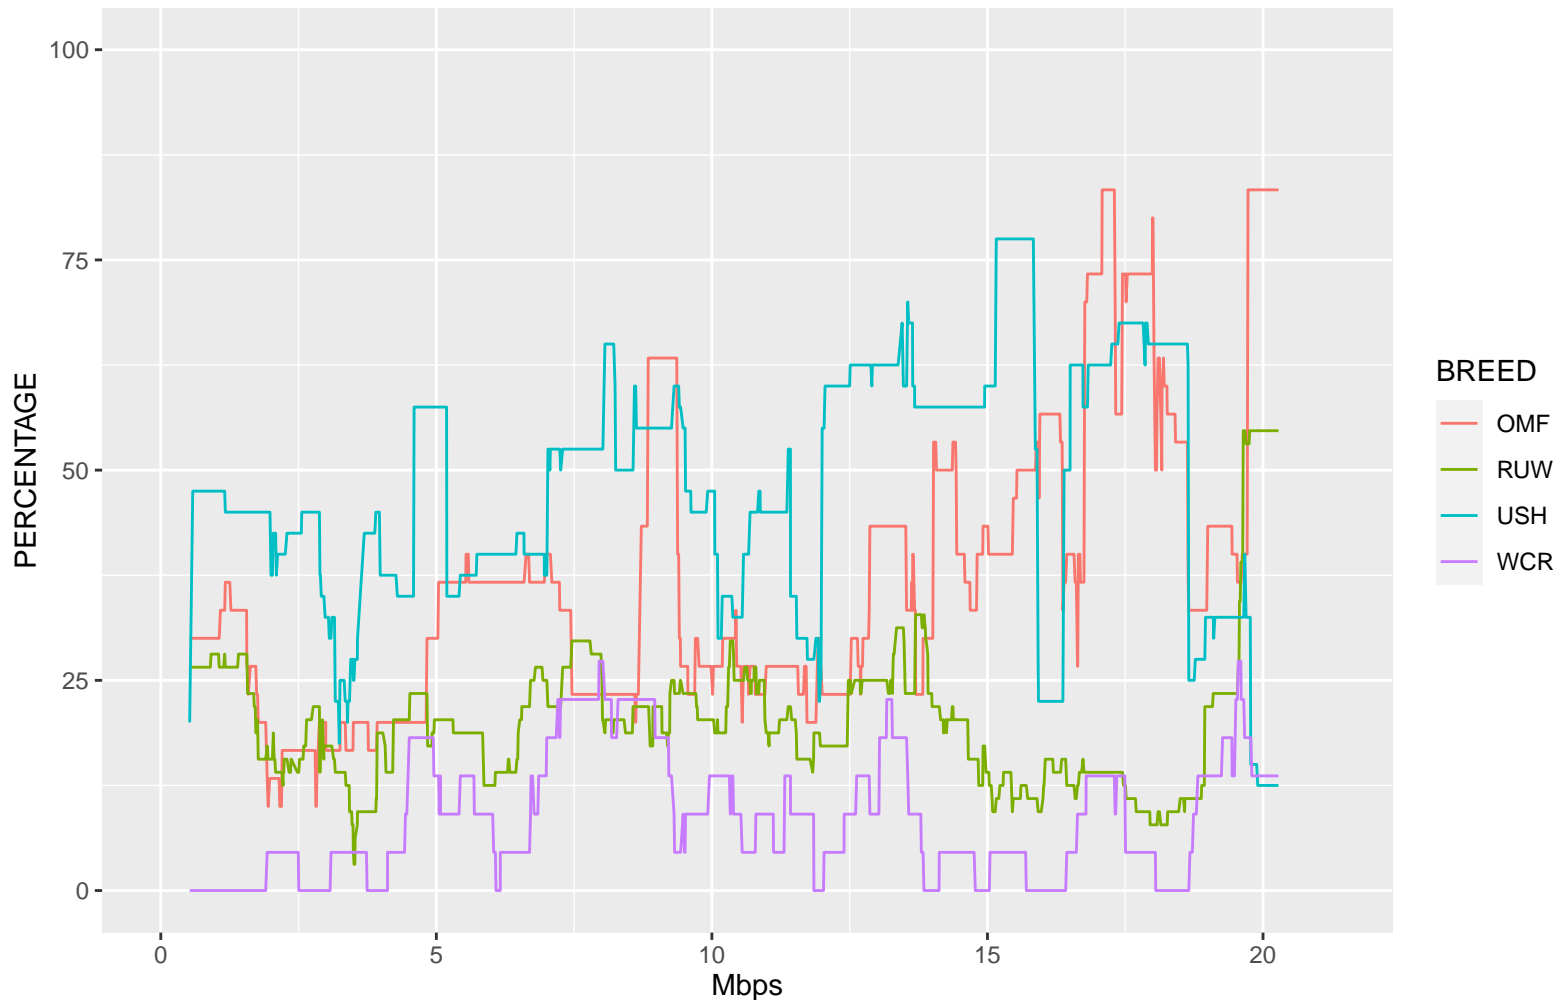

# Chromosome 13

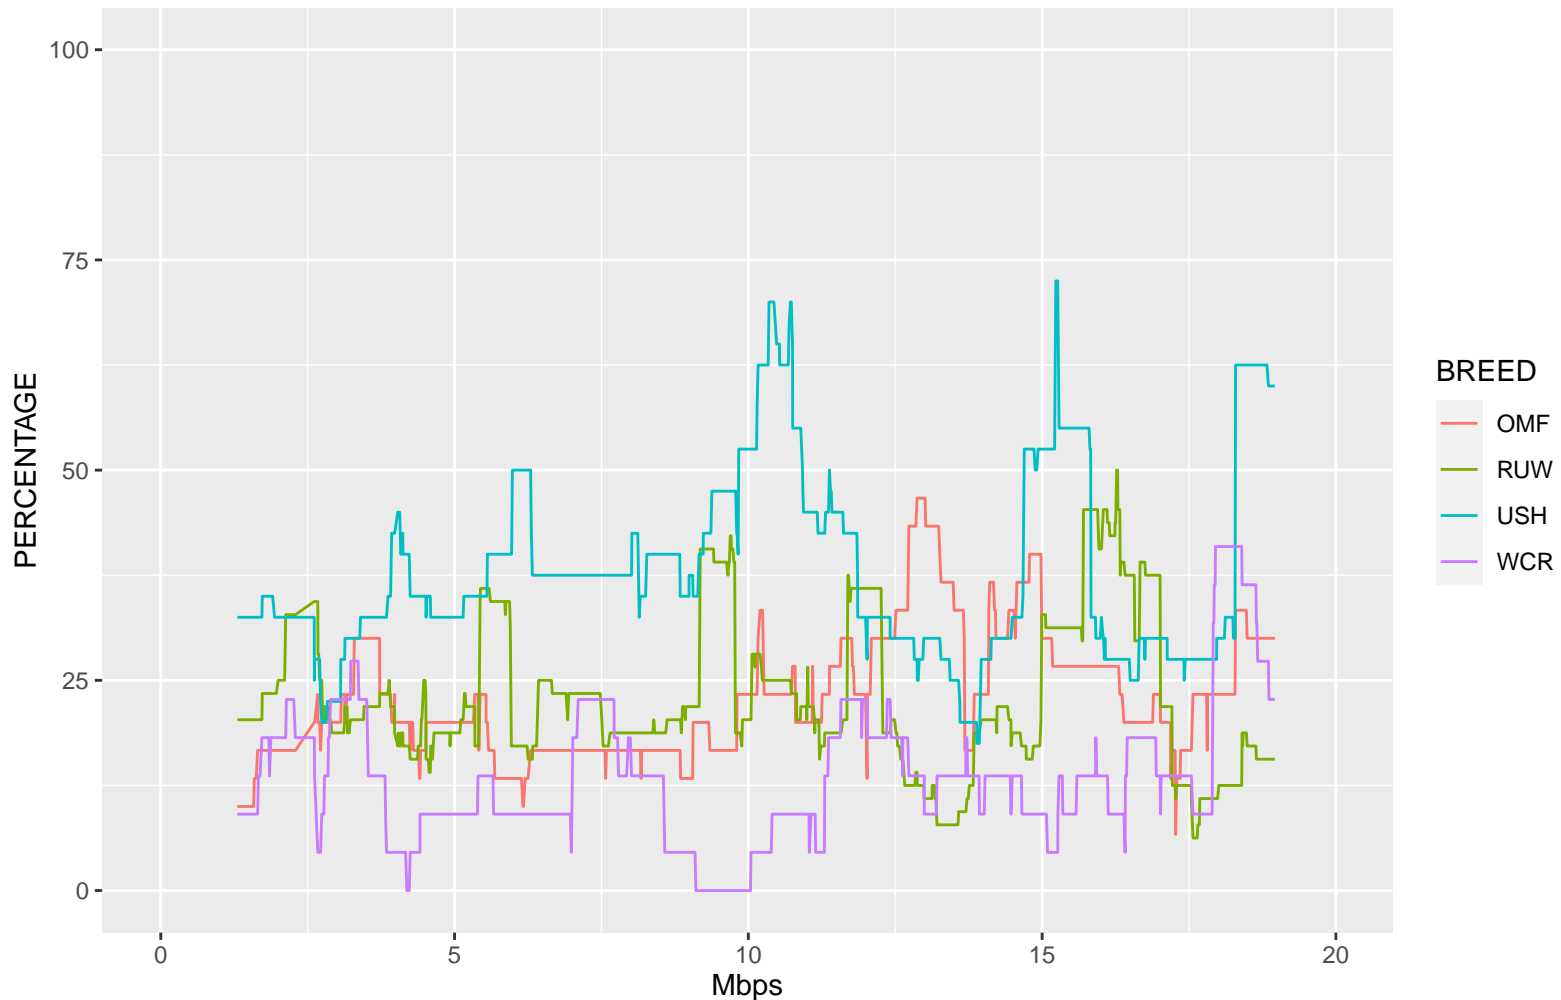

# Chromosome 14

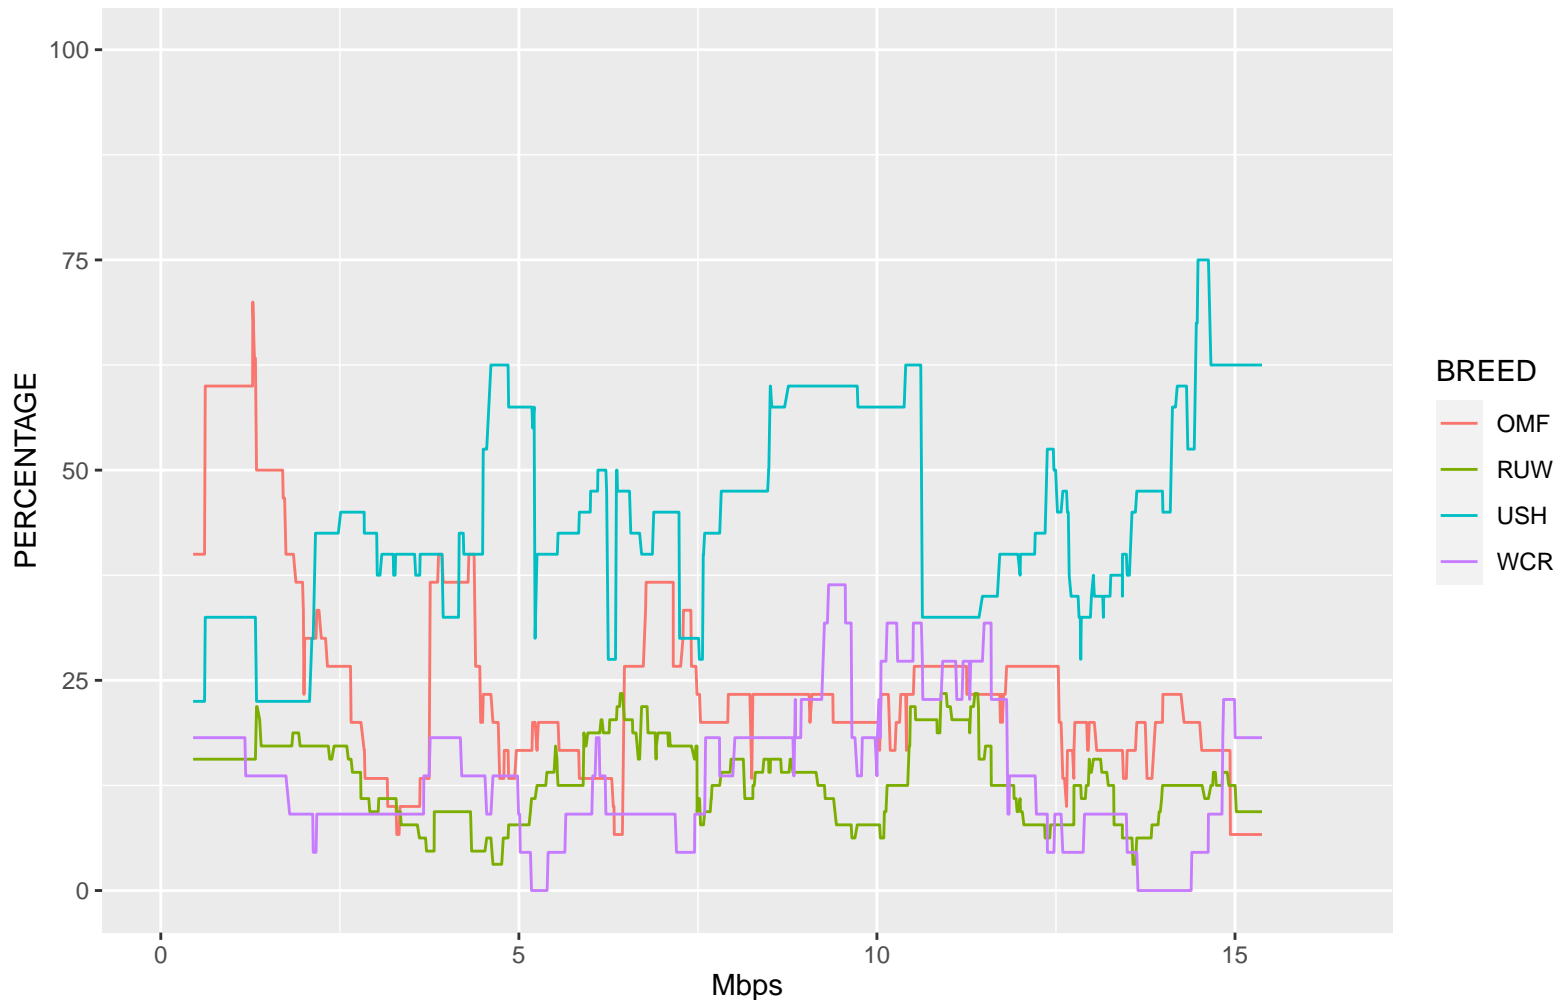

### Chromosome 15

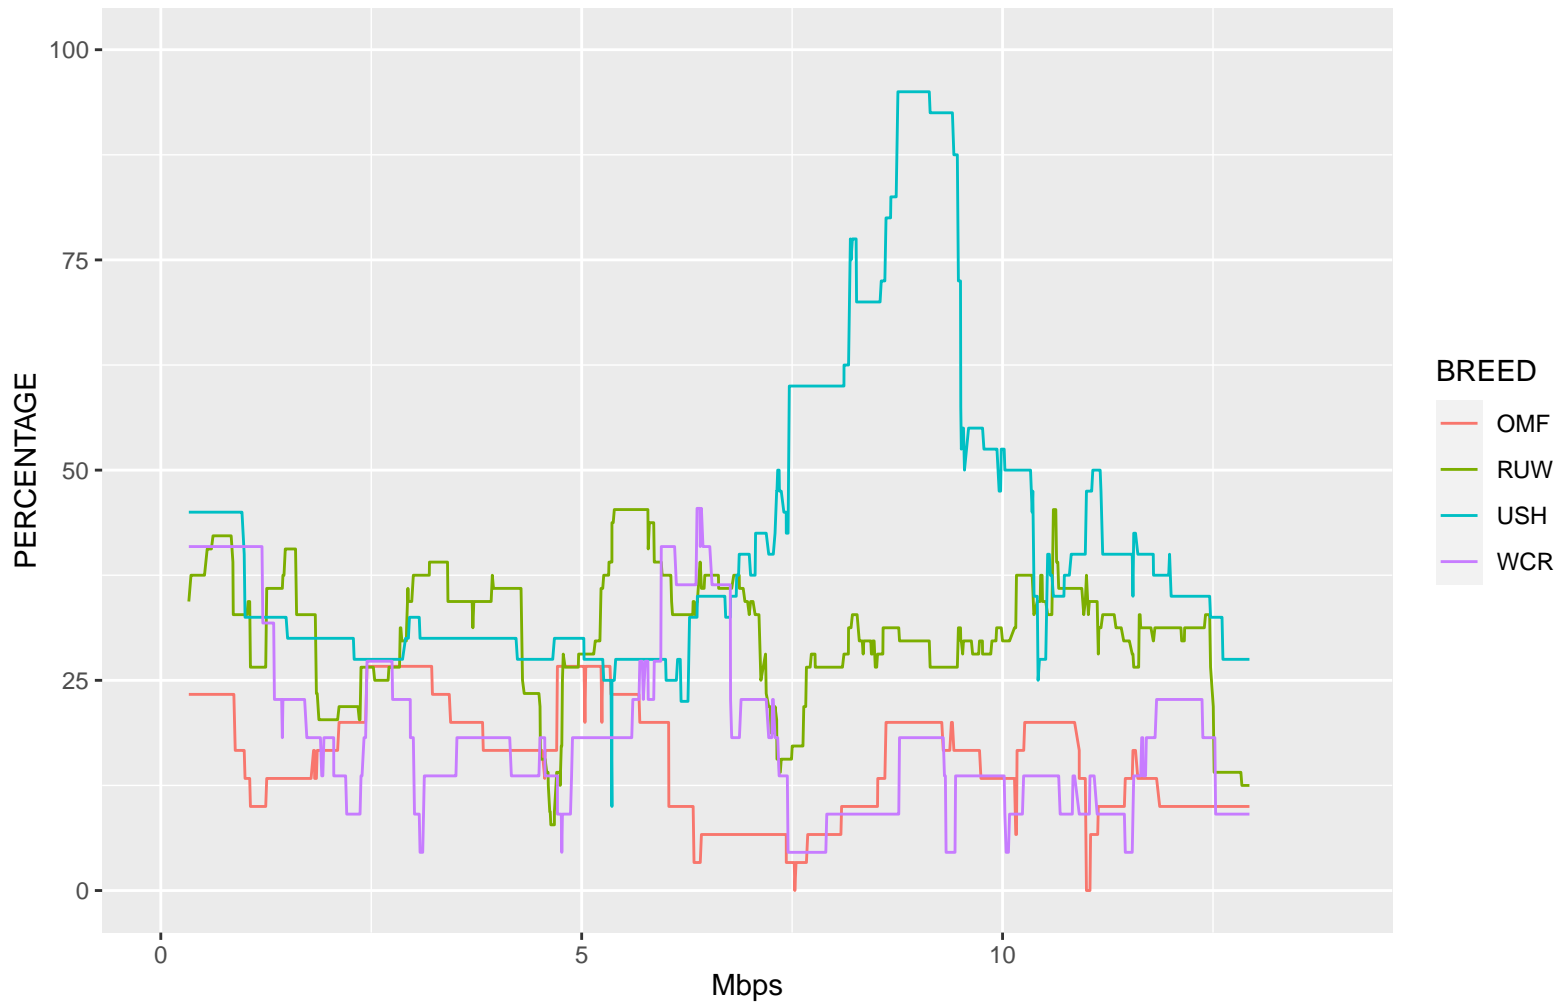

# Chromosome 17

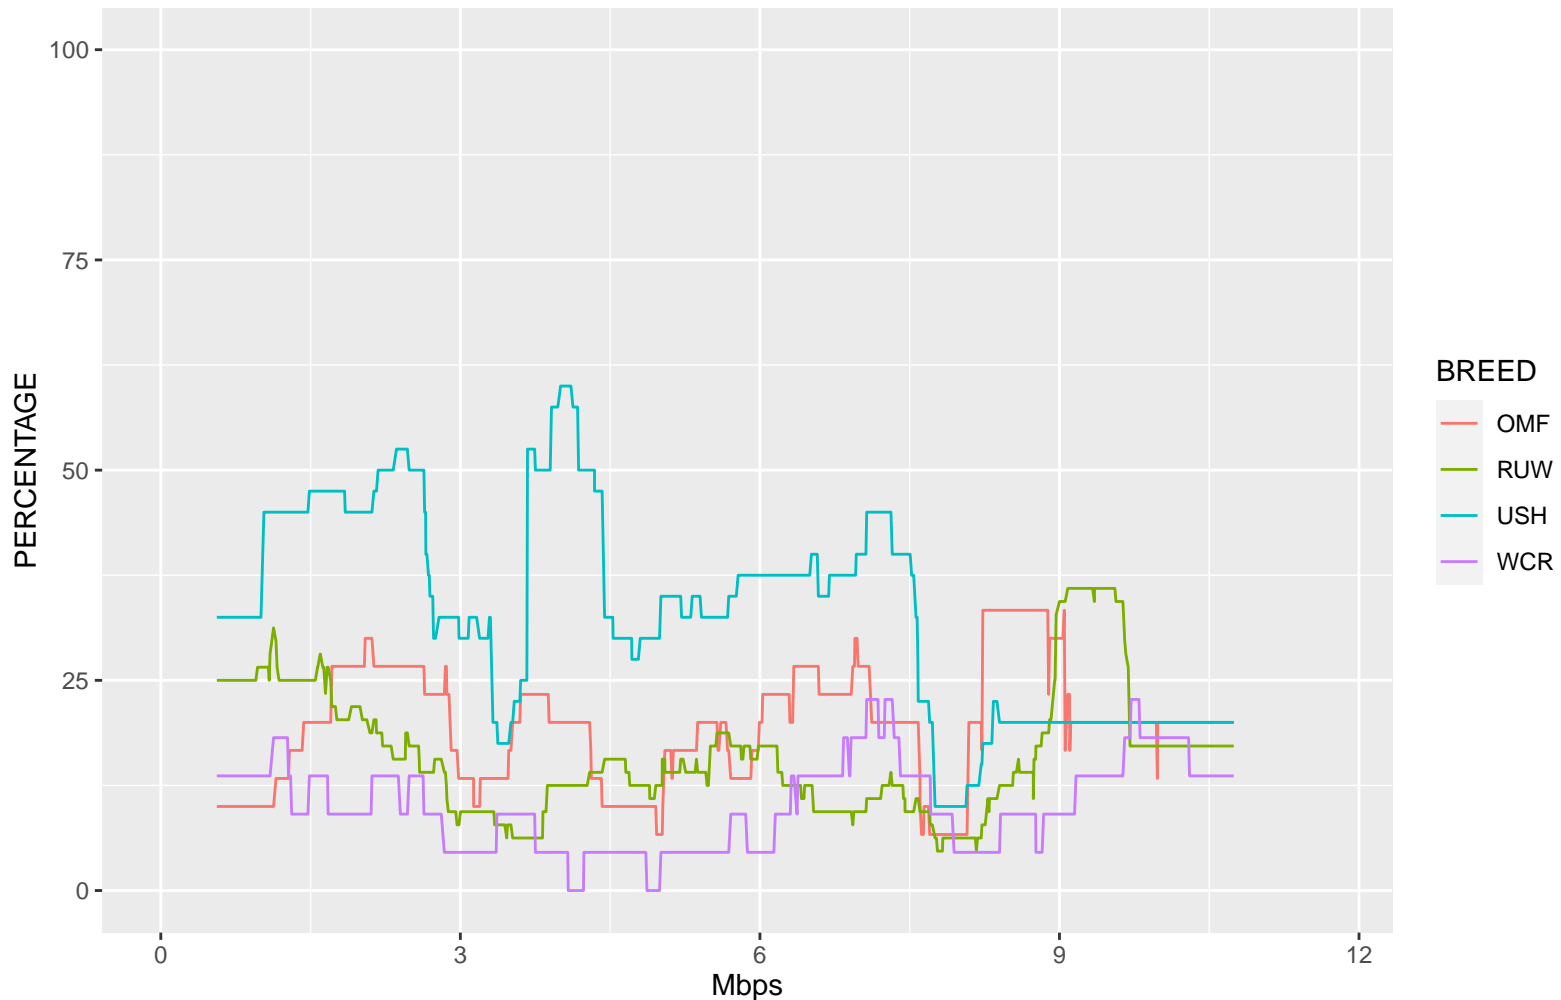



# Chromosome 18

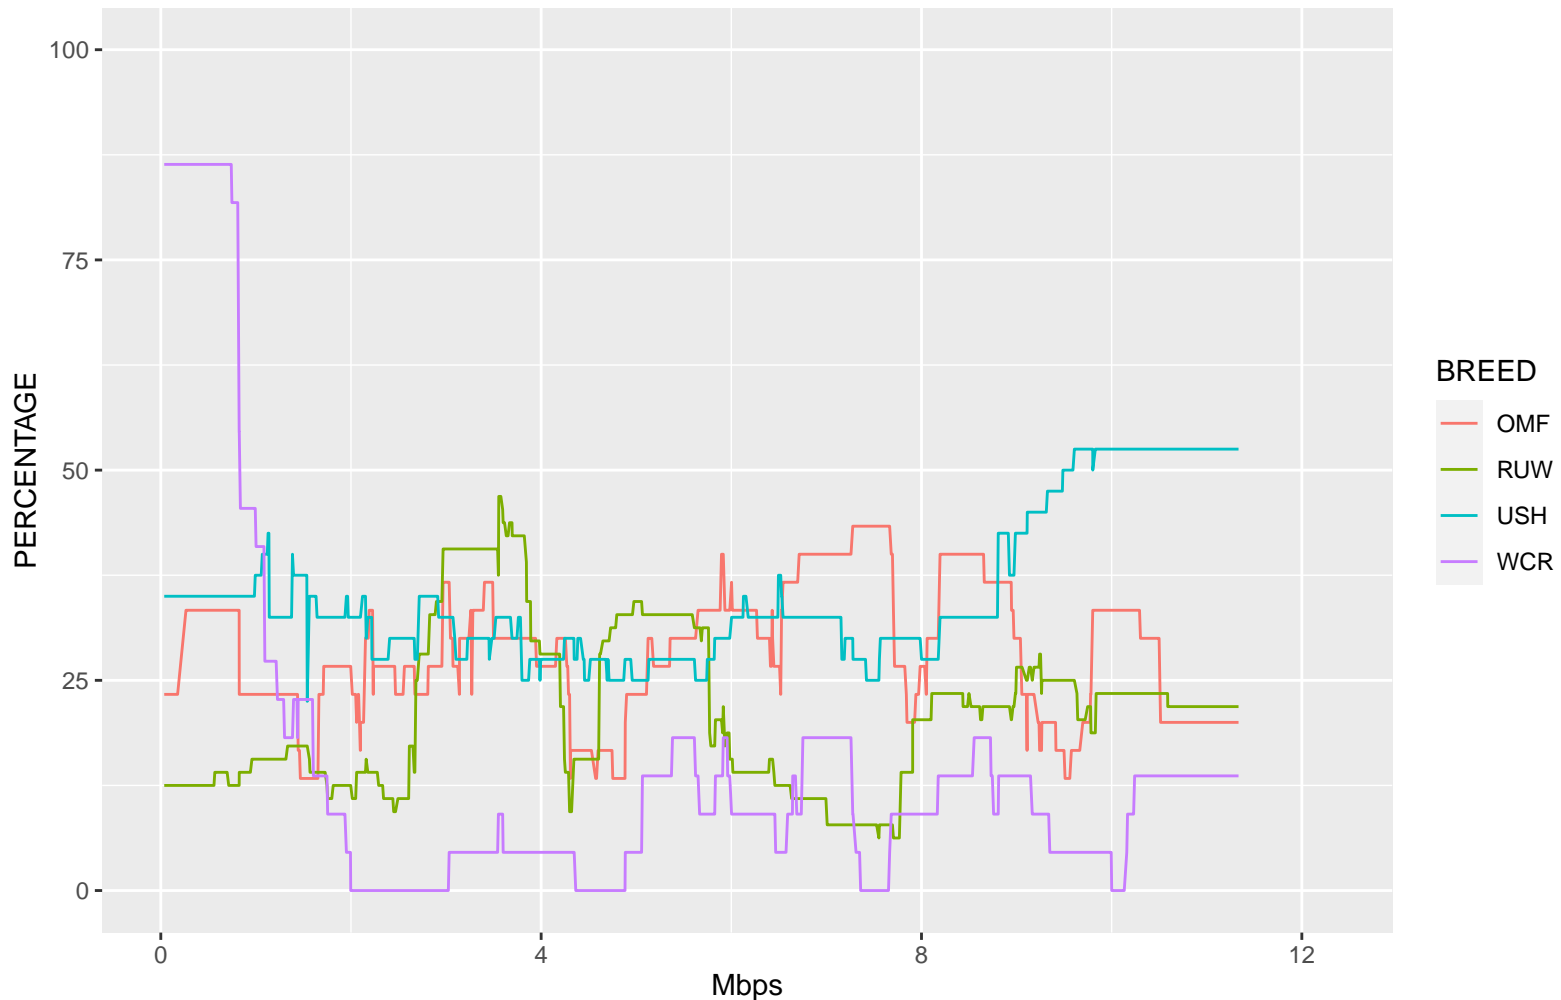

# Chromosome 19

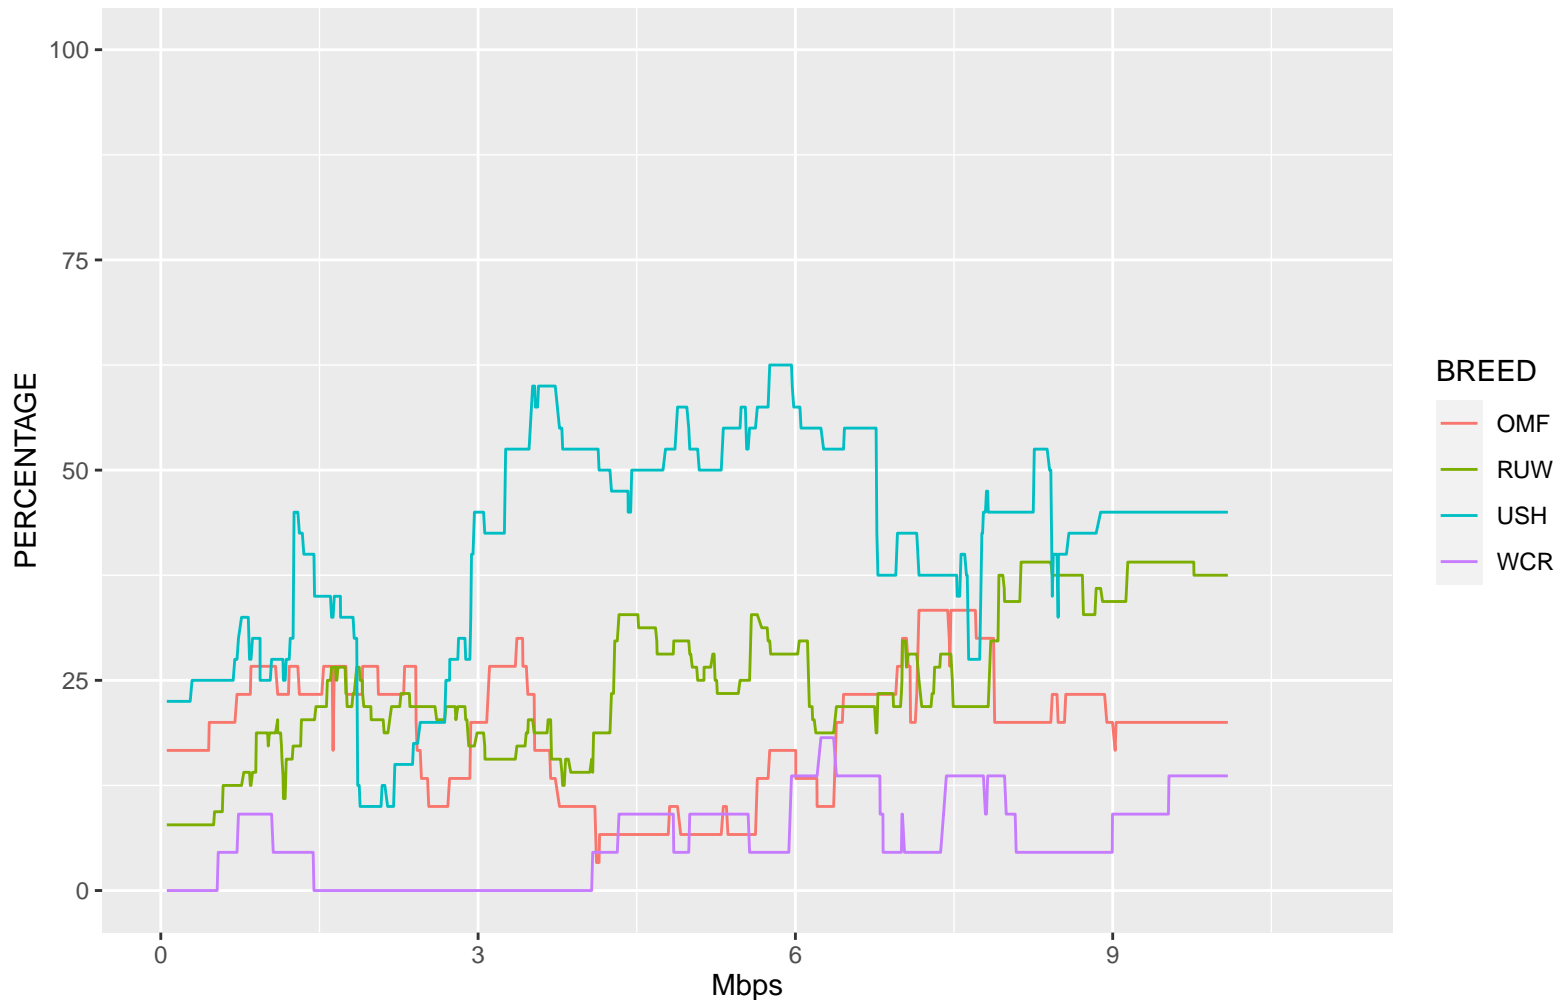

# Chromosome 20

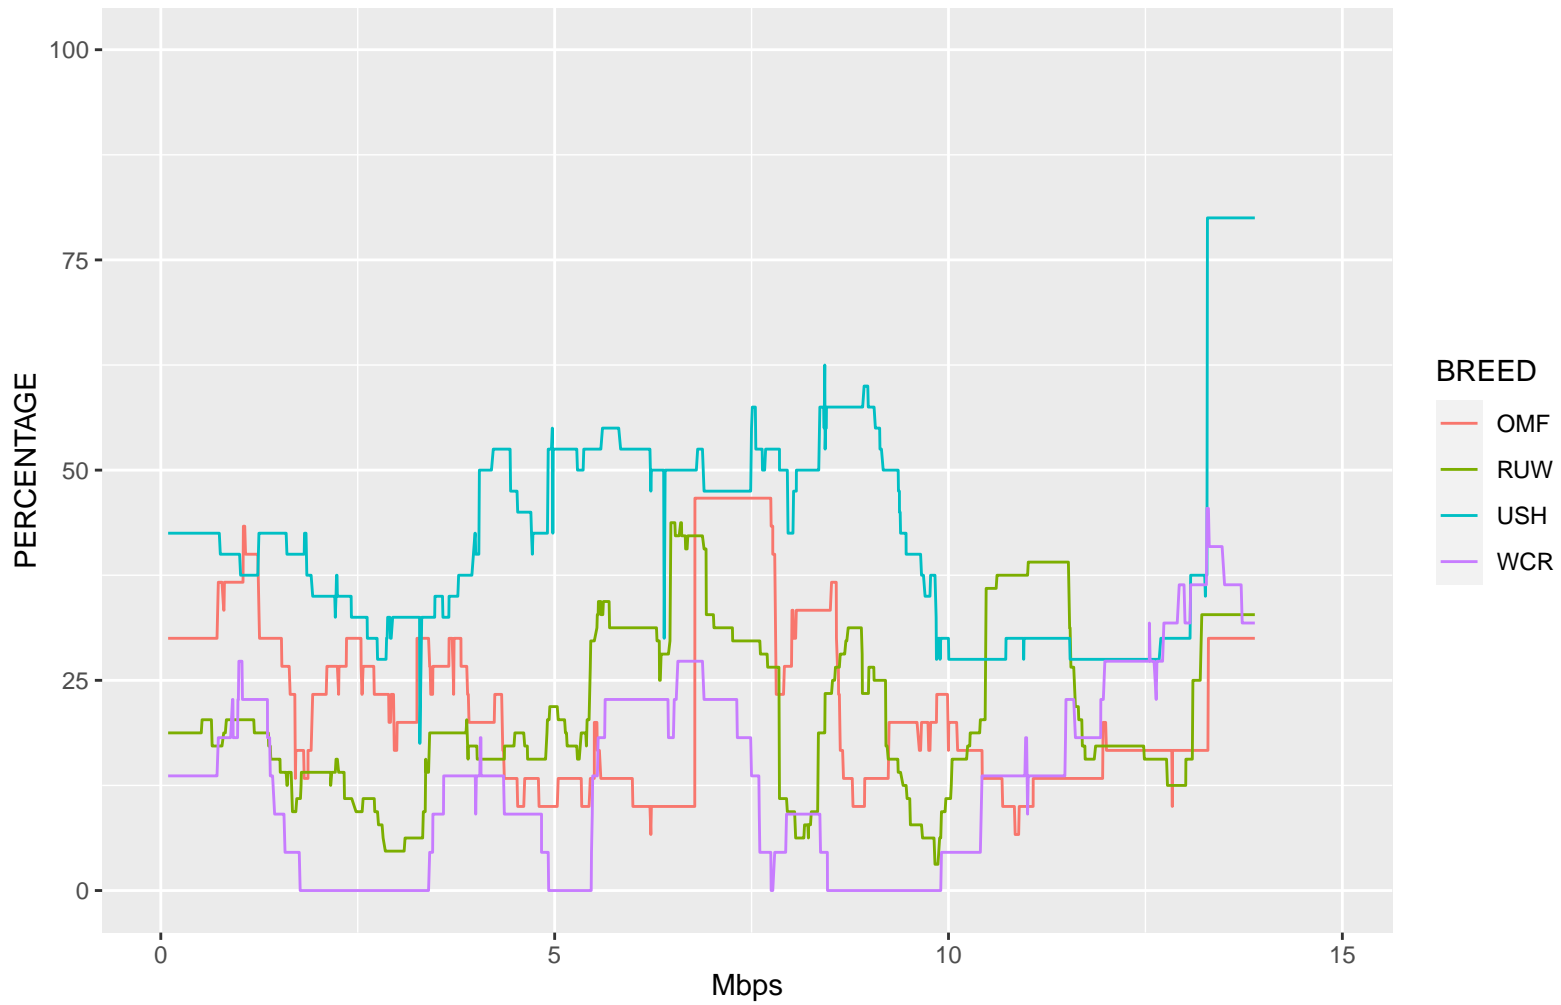

# Chromosome 21

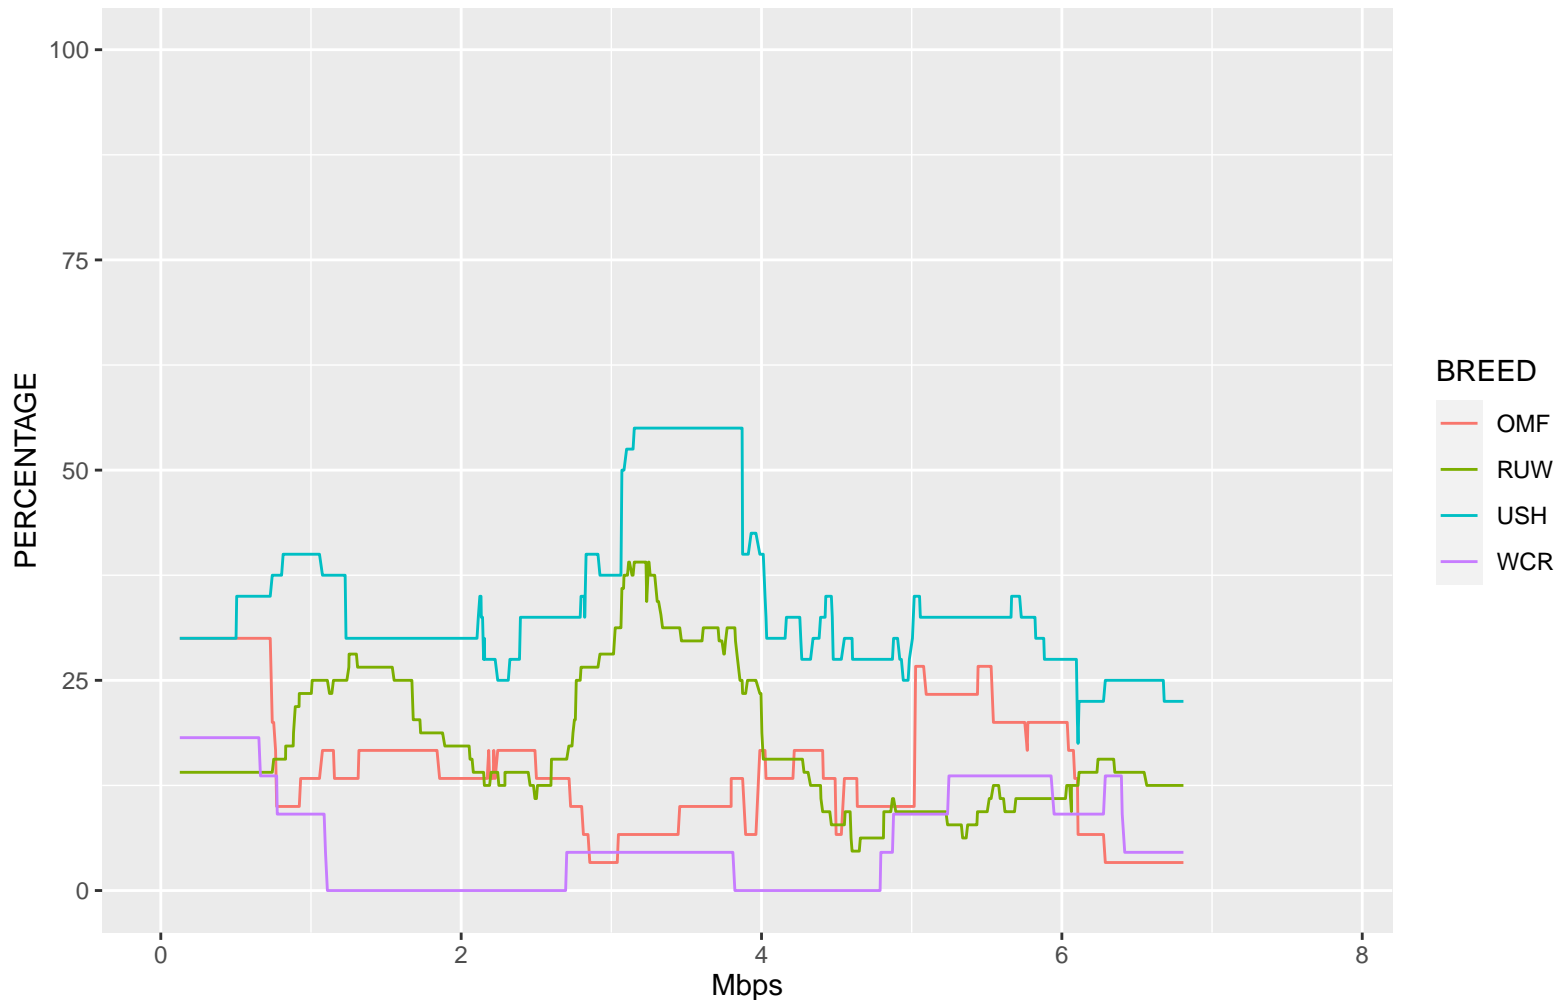

# Chromosome 22

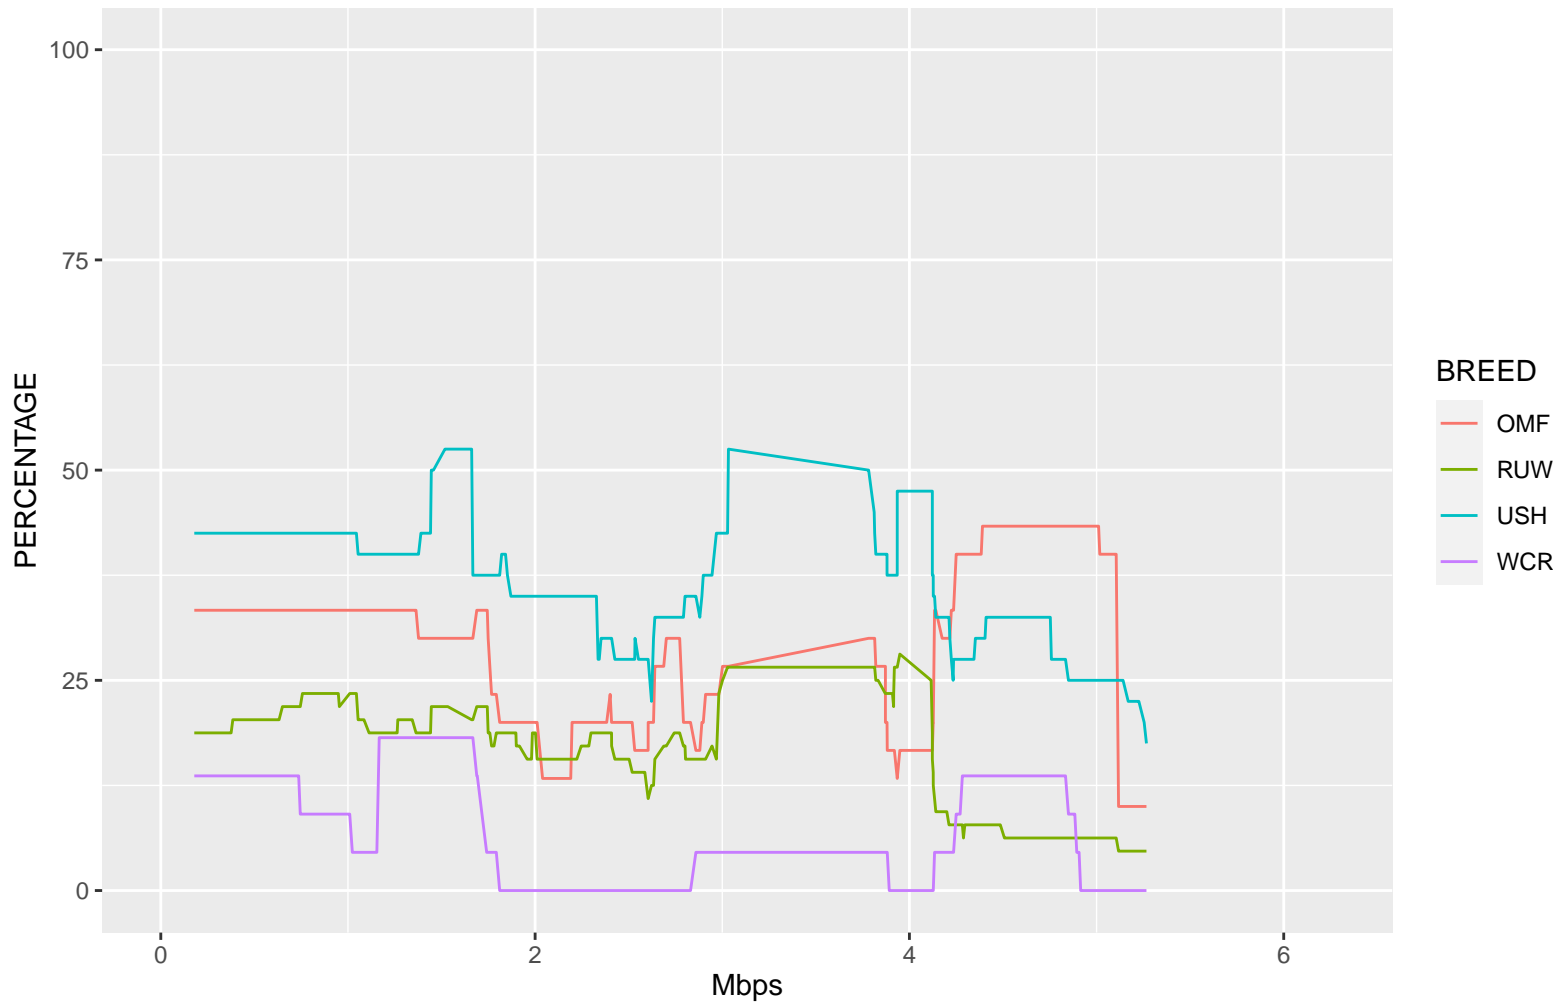

# Chromosome 23

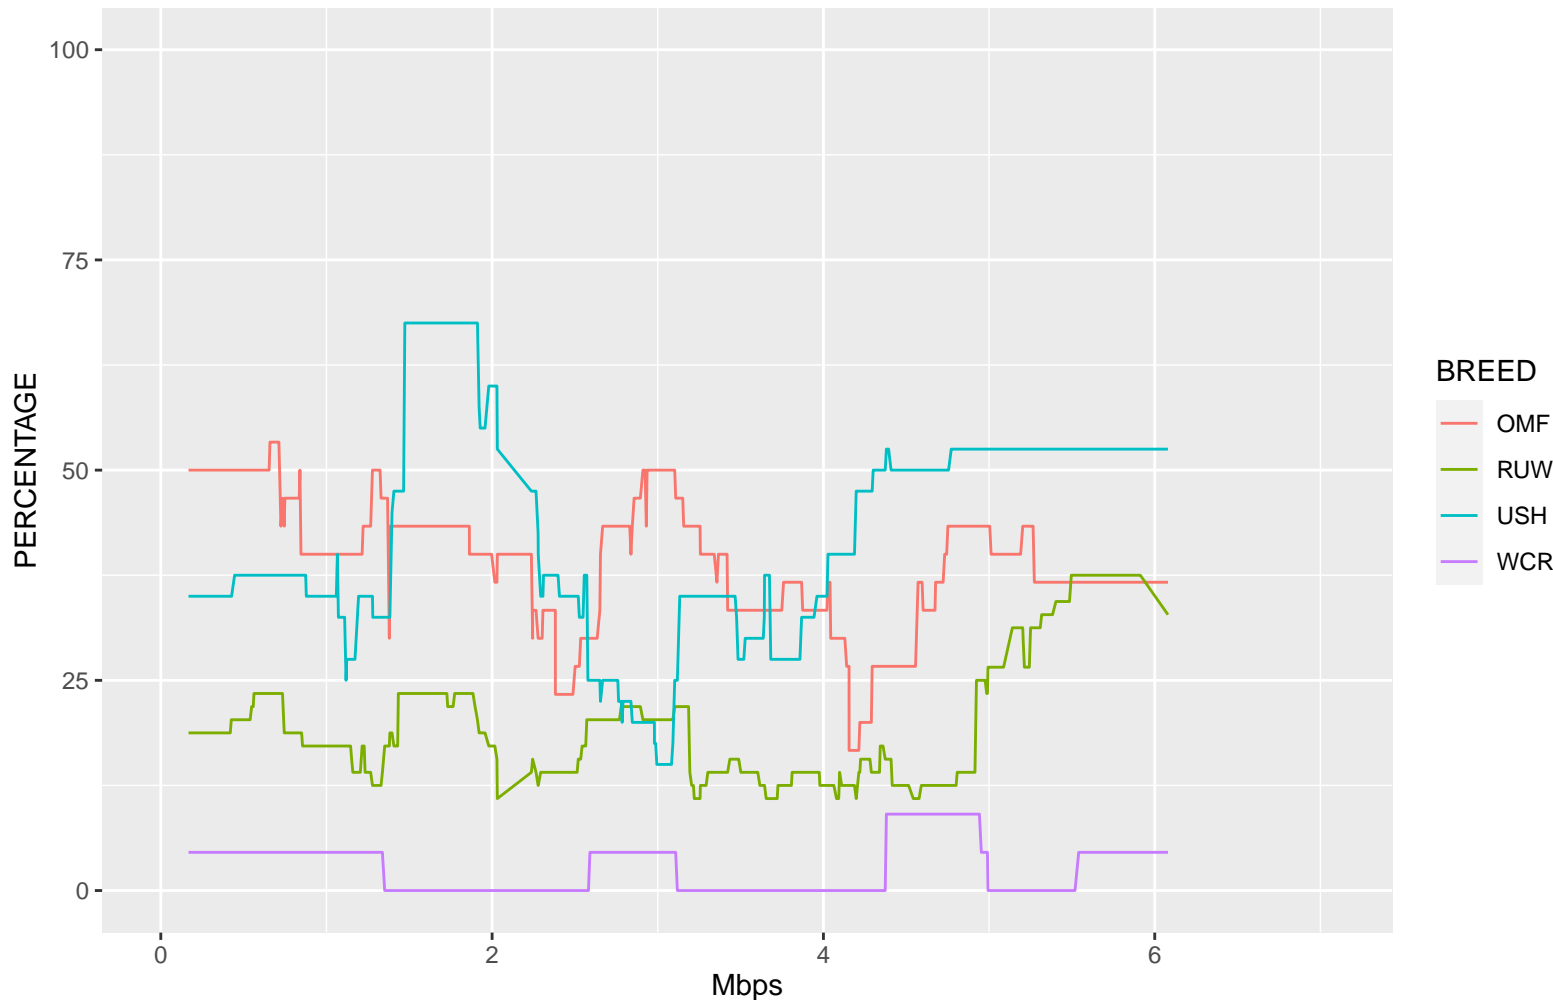

# Chromosome 24

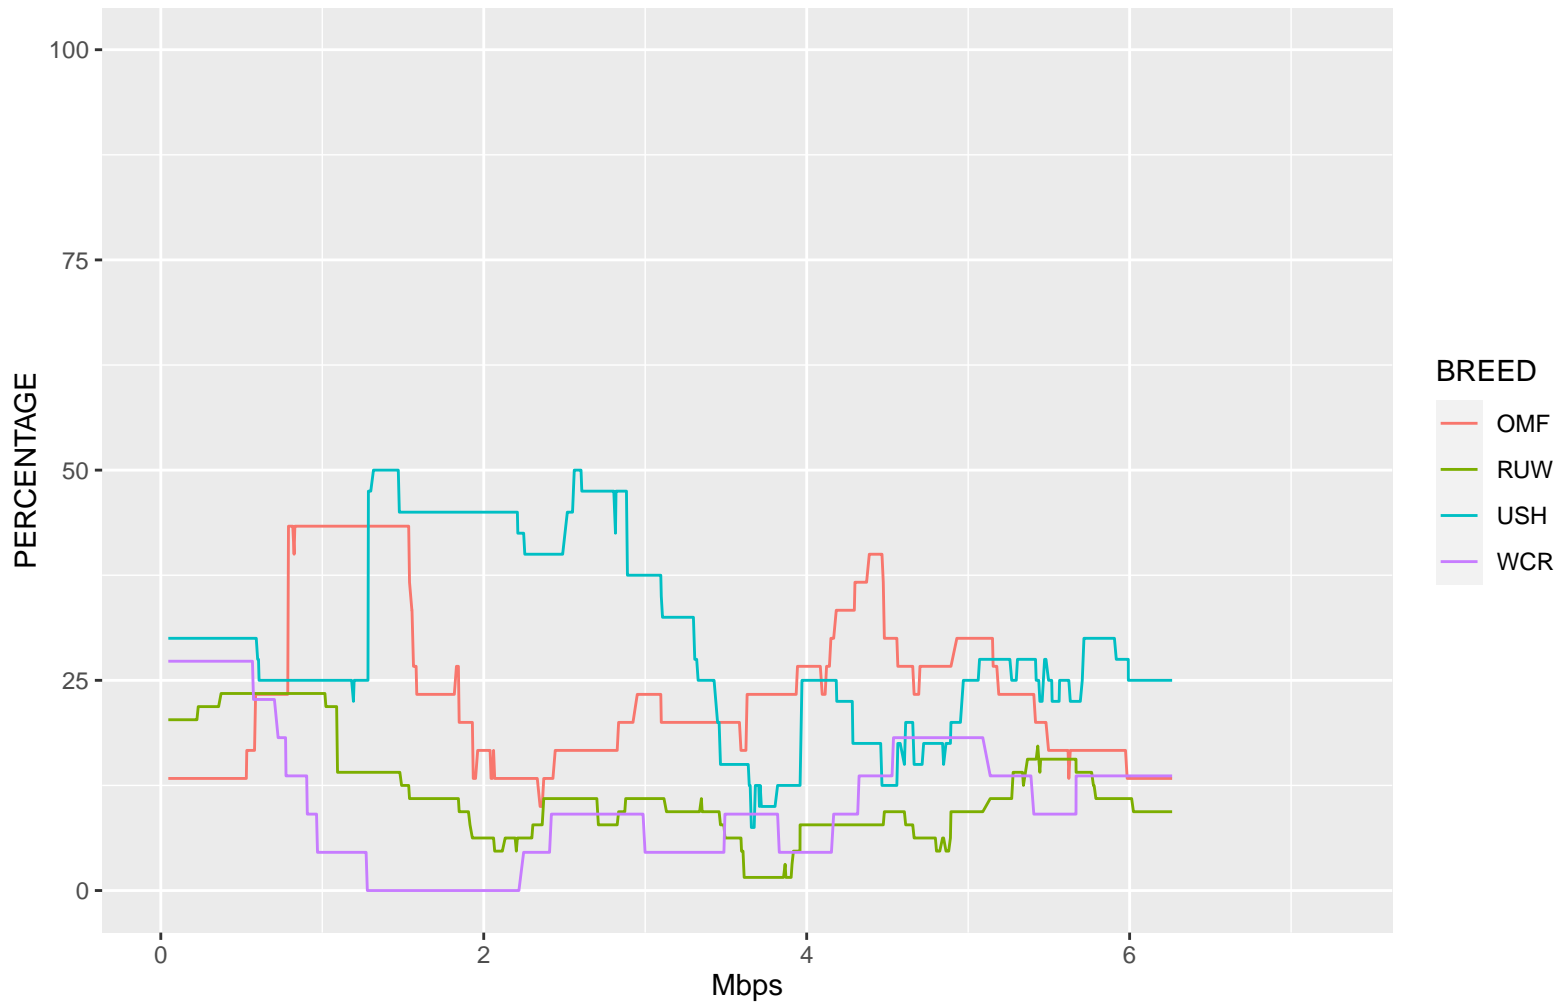

# Chromosome 25

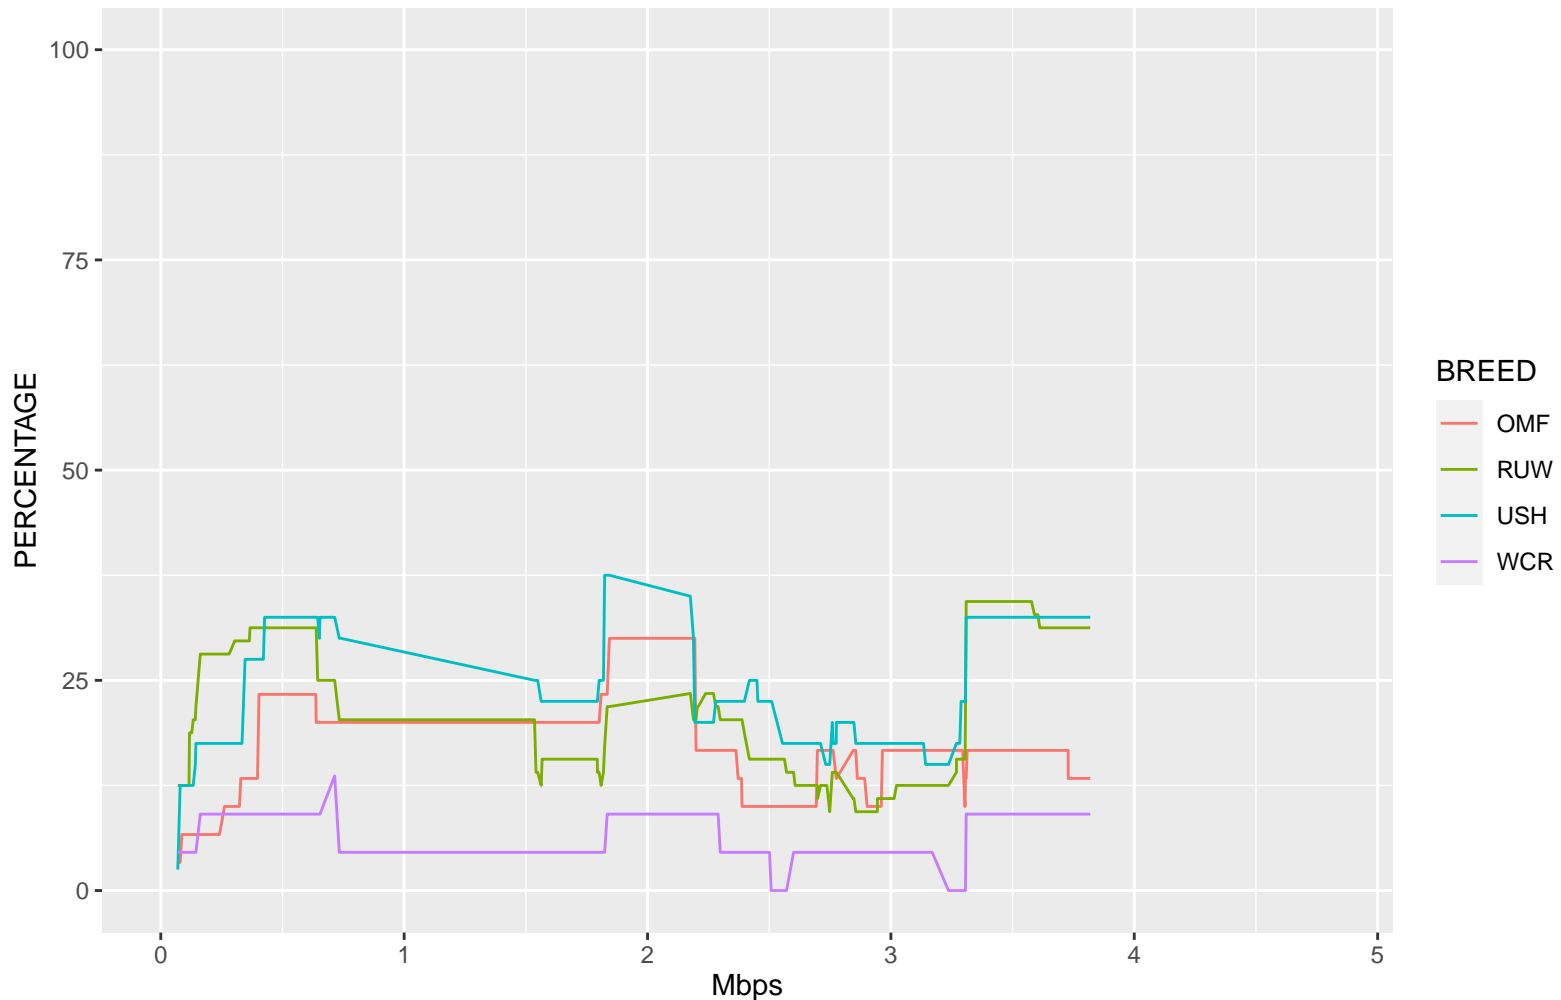



## Chromosome 26

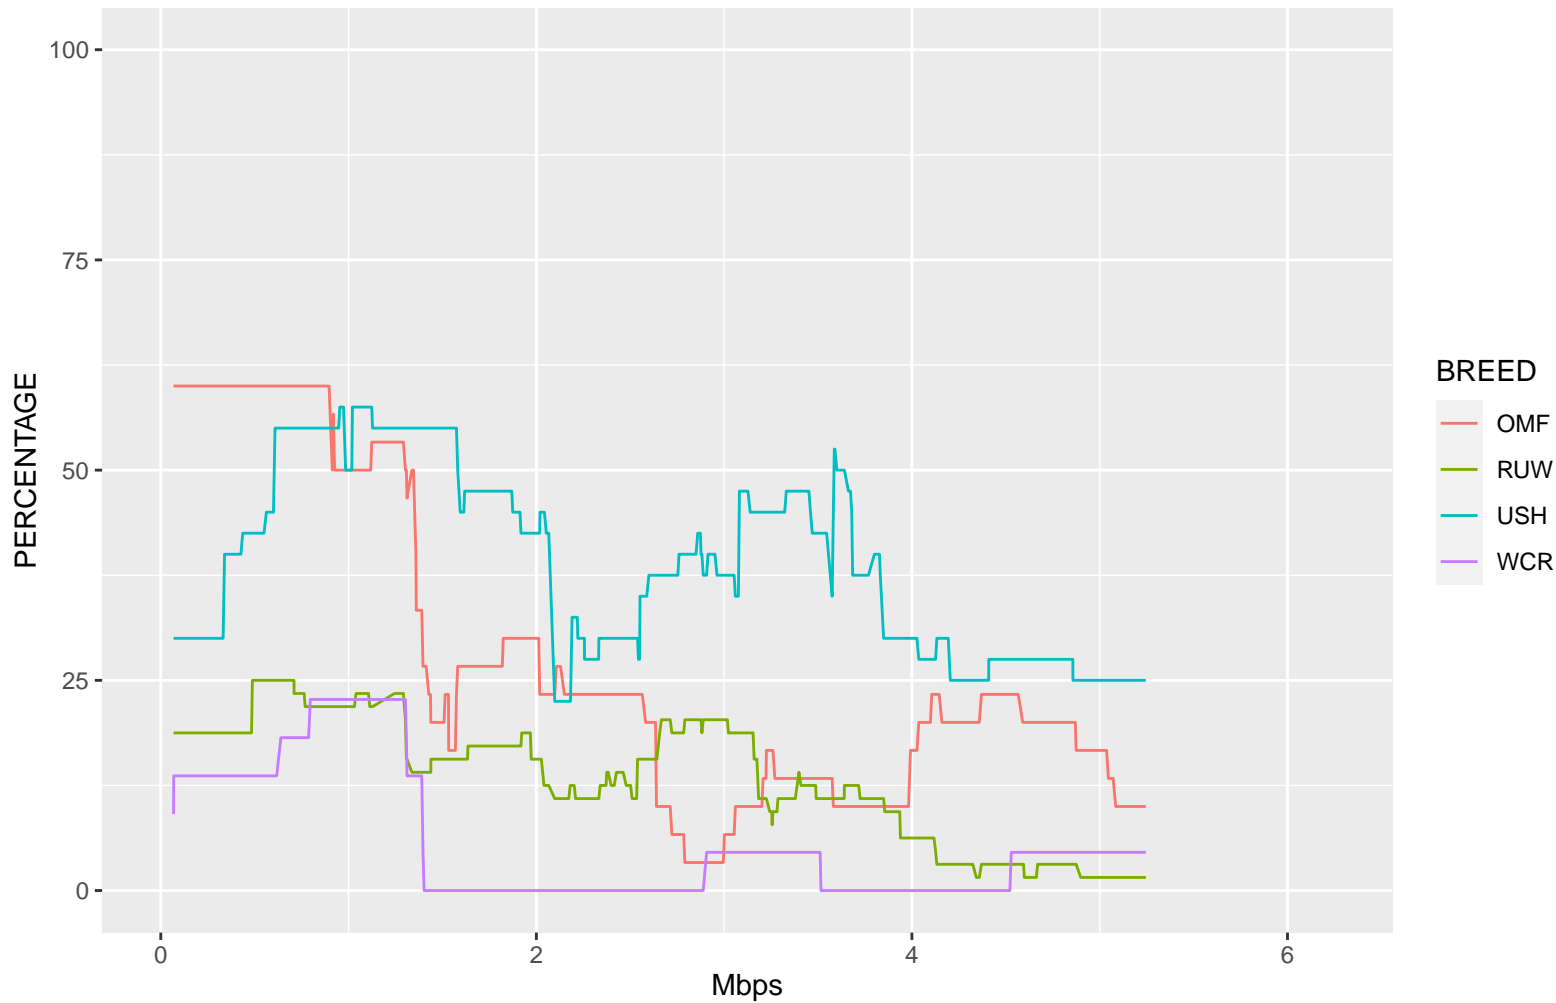

### Chromosome 27

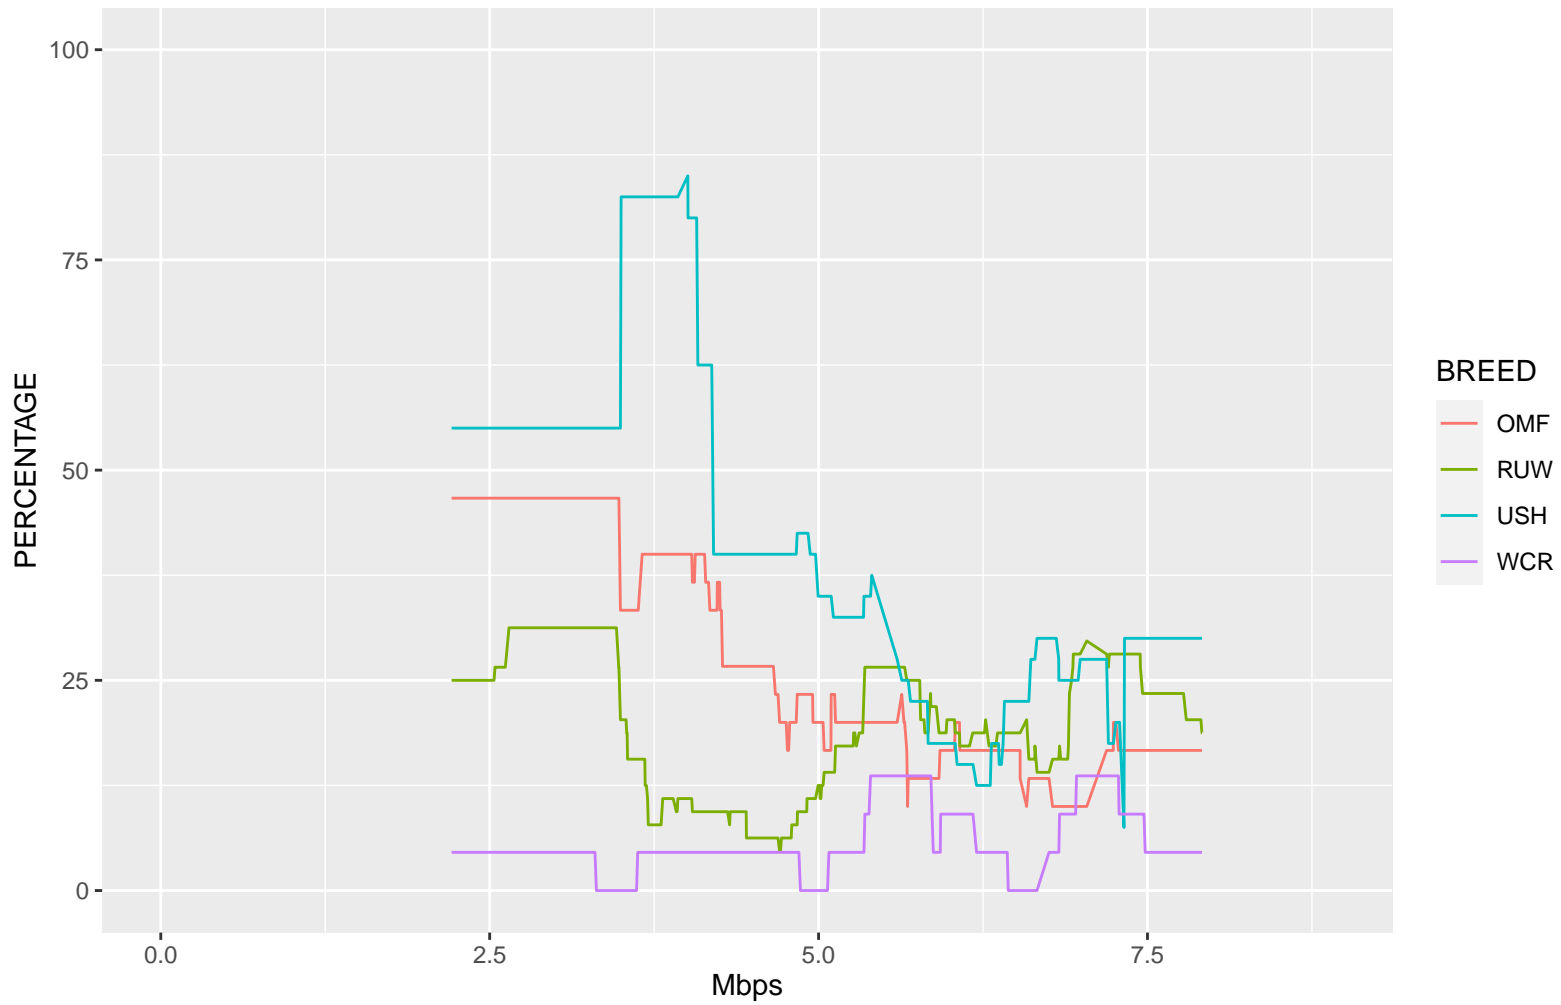

# Chromosome 28

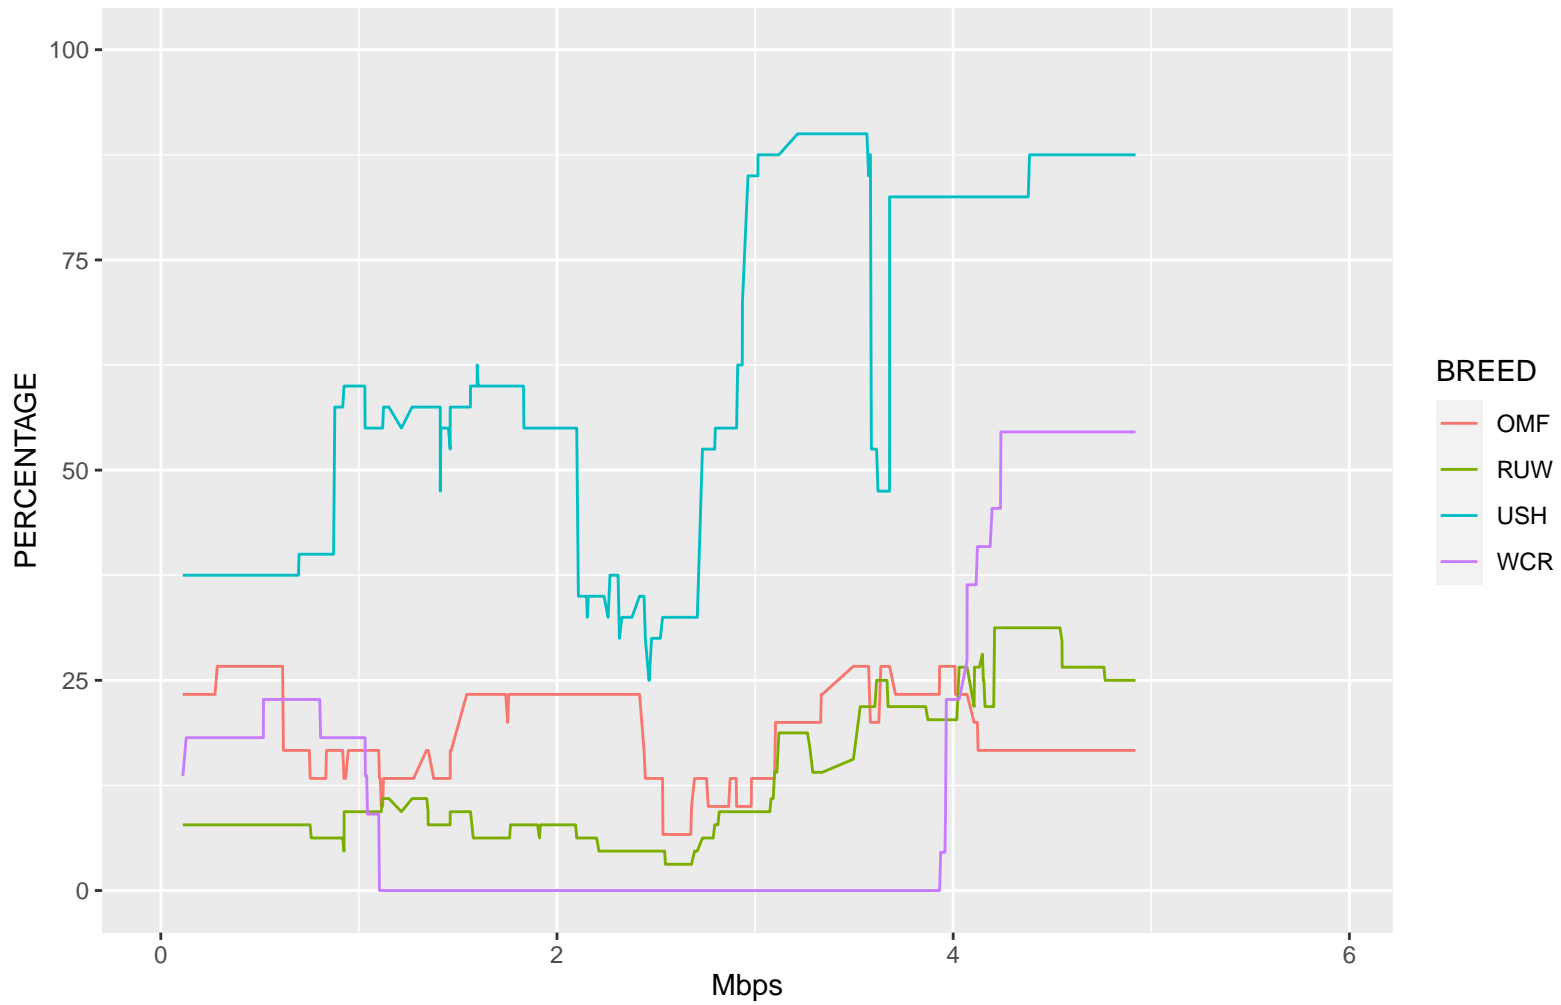

Supplement: MOESM3 [file 40104_2022_813_MOESM3_ESM.pdf]
